# Supplementary material for: Real-time monitoring of superoxide anion radical generation in response to wounding: electrochemical study
Source: PeerJ. 2017 Jul 13;5:e3050. doi: 10.7717/peerj.3050 (PMC5527980; doi:10.7717/peerj.3050)
Supplement: Data S5 — Supplementary data for Figs. 2, 4 and 6. [file peerj-05-3050-s005.xlsx]

## Sheet: Sheet1
XOD(mU/mL)	O2-･(μmol/L)	⊿I
0	0	0	0	0	0
1	0.182574								Fig2
5	0.408248	12.52	13.22	13.24	12.9933
10	0.57735	19.81	19.97	19.8	19.86
20	0.816497	30.66	31.2	31.01	30.9567
30	1
40	1.1547
50	1.29099	50.25	55.21	45.29	50.25
60	1.41421
XOD(mU/mL)	1	2	3	4
30
40
50

## Sheet: Sheet2
0	2.52075e-10
0.1	2.47955e-10
0.2	2.52075e-10				Fig4A
0.3	2.23389e-10
0.4	2.36664e-10
0.5	2.46277e-10
0.6	2.44904e-10
0.7	2.34222e-10
0.8	2.39258e-10
0.9	2.40173e-10
1	2.37274e-10
1.1	2.49329e-10
1.2	2.45972e-10
1.3	2.30103e-10
1.4	2.32086e-10
1.5	2.47955e-10
1.6	2.45667e-10
1.7	2.40631e-10
1.8	2.57263e-10
1.9	2.42767e-10
2	2.3468e-10
2.1	2.3941e-10
2.2	2.14386e-10
2.3	2.43835e-10
2.4	2.33917e-10
2.5	2.5177e-10
2.6	2.32544e-10
2.7	2.45819e-10
2.8	2.54974e-10
2.9	2.38495e-10
3	2.49023e-10
3.1	2.33612e-10
3.2	2.65045e-10
3.3	2.43835e-10
3.4	2.3819e-10
3.5	2.3468e-10
3.6	2.21558e-10
3.7	2.37427e-10
3.8	2.35596e-10
3.9	2.22168e-10
4	2.47955e-10
4.1	2.44293e-10
4.2	2.2171e-10
4.3	2.38342e-10
4.4	2.44751e-10
4.5	2.52991e-10
4.6	2.37885e-10
4.7	2.25067e-10
4.8	2.38342e-10
4.9	2.33002e-10
5	2.2522e-10
5.1	2.49176e-10
5.2	2.38495e-10
5.3	2.53906e-10
5.4	2.11334e-10
5.5	2.42157e-10
5.6	2.2995e-10
5.7	2.44446e-10
5.8	2.27966e-10
5.9	2.22626e-10
6	2.31323e-10
6.1	2.28882e-10
6.2	2.53448e-10
6.3	2.20947e-10
6.4	2.36206e-10
6.5	2.41699e-10
6.6	2.29645e-10
6.7	2.33002e-10
6.8	2.33765e-10
6.9	2.39105e-10
7	2.37122e-10
7.1	2.27356e-10
7.2	2.38495e-10
7.3	2.2049e-10
7.4	2.25525e-10
7.5	2.388e-10
7.6	2.43225e-10
7.7	2.40479e-10
7.8	2.29797e-10
7.9	2.31018e-10
8	2.54974e-10
8.1	2.39868e-10
8.2	2.61688e-10
8.3	2.20032e-10
8.4	2.35748e-10
8.5	2.24152e-10
8.6	2.5177e-10
8.7	2.29645e-10
8.8	2.35748e-10
8.9	2.53601e-10
9	2.35138e-10
9.1	2.24762e-10
9.2	2.28271e-10
9.3	2.47345e-10
9.4	2.24152e-10
9.5	2.30103e-10
9.6	2.31628e-10
9.7	2.2583e-10
9.8	2.15759e-10
9.9	2.36816e-10
10	2.25067e-10
10.1	2.14233e-10
10.2	2.31628e-10
10.3	2.40936e-10
10.4	2.27356e-10
10.5	2.3468e-10
10.6	2.25372e-10
10.7	2.30408e-10
10.8	2.32239e-10
10.9	2.49329e-10
11	2.29797e-10
11.1	2.3056e-10
11.2	2.36511e-10
11.3	2.45209e-10
11.4	2.36206e-10
11.5	2.38495e-10
11.6	2.36053e-10
11.7	2.47345e-10
11.8	2.32391e-10
11.9	2.05231e-10
12	2.21405e-10
12.1	2.2934e-10
12.2	2.32239e-10
12.3	2.42462e-10
12.4	2.25372e-10
12.5	2.24304e-10
12.6	2.40936e-10
12.7	2.28271e-10
12.8	2.46887e-10
12.9	2.32086e-10
13	2.46582e-10
13.1	2.11487e-10
13.2	2.30865e-10
13.3	2.19116e-10
13.4	2.23236e-10
13.5	2.55432e-10
13.6	2.11334e-10
13.7	2.30865e-10
13.8	2.44446e-10
13.9	2.38647e-10
14	2.49023e-10
14.1	2.37579e-10
14.2	2.34222e-10
14.3	2.33002e-10
14.4	2.47192e-10
14.5	2.52991e-10
14.6	2.24762e-10
14.7	2.2934e-10
14.8	2.29492e-10
14.9	2.42615e-10
15	2.43073e-10
15.1	2.07367e-10
15.2	2.57721e-10
15.3	2.40021e-10
15.4	2.3468e-10
15.5	2.41394e-10
15.6	2.33154e-10
15.7	2.33765e-10
15.8	2.16675e-10
15.9	2.4826e-10
16	2.2995e-10
16.1	2.48718e-10
16.2	2.18201e-10
16.3	2.25372e-10
16.4	2.18964e-10
16.5	2.42615e-10
16.6	2.44446e-10
16.7	2.22321e-10
16.8	2.28271e-10
16.9	2.45972e-10
17	2.19421e-10
17.1	2.25677e-10
17.2	2.22626e-10
17.3	2.40326e-10
17.4	2.28271e-10
17.5	2.36359e-10
17.6	2.38037e-10
17.7	2.36359e-10
17.8	2.50702e-10
17.9	2.44293e-10
18	2.39105e-10
18.1	2.11945e-10
18.2	2.15912e-10
18.3	2.23083e-10
18.4	2.21252e-10
18.5	2.30408e-10
18.6	2.36816e-10
18.7	2.57568e-10
18.8	2.35291e-10
18.9	2.21863e-10
19	2.30103e-10
19.1	2.2995e-10
19.2	2.14539e-10
19.3	2.30408e-10
19.4	2.22168e-10
19.5	2.18658e-10
19.6	2.19421e-10
19.7	2.42462e-10
19.8	2.18658e-10
19.9	2.35596e-10
20	2.23694e-10
20.1	2.18964e-10
20.2	2.40326e-10
20.3	2.44598e-10
20.4	2.57111e-10
20.5	2.36511e-10
20.6	2.23389e-10
20.7	2.48413e-10
20.8	2.34528e-10
20.9	2.24915e-10
21	2.29034e-10
21.1	2.15759e-10
21.2	2.49329e-10
21.3	2.14844e-10
21.4	2.30865e-10
21.5	2.30255e-10
21.6	2.39868e-10
21.7	2.22168e-10
21.8	2.36511e-10
21.9	2.388e-10
22	2.4765e-10
22.1	2.12402e-10
22.2	2.50702e-10
22.3	2.58026e-10
22.4	2.41547e-10
22.5	2.21252e-10
22.6	2.29645e-10
22.7	2.2934e-10
22.8	2.2583e-10
22.9	2.35443e-10
23	2.41394e-10
23.1	2.32239e-10
23.2	2.23236e-10
23.3	2.2522e-10
23.4	2.14844e-10
23.5	2.4826e-10
23.6	2.565e-10
23.7	2.33307e-10
23.8	2.35596e-10
23.9	2.19421e-10
24	2.33154e-10
24.1	2.11945e-10
24.2	2.25677e-10
24.3	2.47192e-10
24.4	2.23541e-10
24.5	2.30713e-10
24.6	2.39105e-10
24.7	2.43988e-10
24.8	2.41547e-10
24.9	2.18353e-10
25	2.26898e-10
25.1	2.2644e-10
25.2	2.36053e-10
25.3	2.31171e-10
25.4	2.32697e-10
25.5	2.13013e-10
25.6	2.3941e-10
25.7	2.48871e-10
25.8	2.45056e-10
25.9	2.02637e-10
26	2.31171e-10
26.1	2.54211e-10
26.2	2.22473e-10
26.3	2.35138e-10
26.4	2.11945e-10
26.5	2.32849e-10
26.6	2.07977e-10
26.7	2.2644e-10
26.8	2.35291e-10
26.9	2.32391e-10
27	2.36969e-10
27.1	2.25677e-10
27.2	2.35901e-10
27.3	2.22626e-10
27.4	2.26593e-10
27.5	2.37732e-10
27.6	2.41089e-10
27.7	2.15912e-10
27.8	2.33459e-10
27.9	2.31476e-10
28	2.11639e-10
28.1	2.30103e-10
28.2	2.18048e-10
28.3	2.39563e-10
28.4	2.28119e-10
28.5	2.09656e-10
28.6	2.20184e-10
28.7	2.38342e-10
28.8	2.53448e-10
28.9	2.40784e-10
29	2.24304e-10
29.1	2.14691e-10
29.2	2.42004e-10
29.3	2.29645e-10
29.4	2.15149e-10
29.5	2.27814e-10
29.6	2.36664e-10
29.7	2.19879e-10
29.8	2.13928e-10
29.9	2.35291e-10
30	2.09503e-10
30.1	2.63214e-10
30.2	2.23999e-10
30.3	2.41394e-10
30.4	2.14996e-10
30.5	2.40326e-10
30.6	2.02942e-10
30.7	2.31628e-10
30.8	2.24915e-10
30.9	2.31476e-10
31	2.52991e-10
31.1	2.24762e-10
31.2	2.37885e-10
31.3	2.1286e-10
31.4	2.28424e-10
31.5	2.2995e-10
31.6	2.37732e-10
31.7	2.28577e-10
31.8	2.31171e-10
31.9	2.29034e-10
32	2.57568e-10
32.1	2.15454e-10
32.2	2.23846e-10
32.3	2.45514e-10
32.4	2.31781e-10
32.5	2.21405e-10
32.6	2.37885e-10
32.7	2.36359e-10
32.8	2.26135e-10
32.9	2.41852e-10
33	2.15302e-10
33.1	2.34985e-10
33.2	2.28729e-10
33.3	2.34528e-10
33.4	2.23236e-10
33.5	2.33917e-10
33.6	2.15759e-10
33.7	2.50244e-10
33.8	2.43073e-10
33.9	2.43225e-10
34	2.21558e-10
34.1	2.27509e-10
34.2	2.57874e-10
34.3	2.17285e-10
34.4	2.22321e-10
34.5	2.43683e-10
34.6	2.40326e-10
34.7	2.33154e-10
34.8	2.32239e-10
34.9	2.21863e-10
35	2.28729e-10
35.1	2.26593e-10
35.2	2.16217e-10
35.3	2.43683e-10
35.4	2.2934e-10
35.5	2.28577e-10
35.6	2.43683e-10
35.7	2.23846e-10
35.8	2.19116e-10
35.9	2.43378e-10
36	2.30713e-10
36.1	2.27356e-10
36.2	2.22473e-10
36.3	2.13623e-10
36.4	2.18506e-10
36.5	2.26746e-10
36.6	2.30865e-10
36.7	2.32544e-10
36.8	2.18964e-10
36.9	2.32849e-10
37	2.3941e-10
37.1	2.26135e-10
37.2	2.27203e-10
37.3	2.21863e-10
37.4	2.22473e-10
37.5	2.28882e-10
37.6	2.08282e-10
37.7	2.30255e-10
37.8	2.15302e-10
37.9	2.14081e-10
38	2.35443e-10
38.1	2.33917e-10
38.2	2.3819e-10
38.3	2.3056e-10
38.4	2.38037e-10
38.5	2.29492e-10
38.6	2.34222e-10
38.7	2.00806e-10
38.8	2.15302e-10
38.9	2.41394e-10
39	2.37274e-10
39.1	2.11334e-10
39.2	2.32391e-10
39.3	2.44904e-10
39.4	2.02179e-10
39.5	2.10876e-10
39.6	2.28119e-10
39.7	2.37274e-10
39.8	2.31323e-10
39.9	2.30713e-10
40	2.1347e-10
40.1	2.46429e-10
40.2	2.1286e-10
40.3	2.40021e-10
40.4	2.26288e-10
40.5	2.31323e-10
40.6	2.30408e-10
40.7	2.15912e-10
40.8	2.31476e-10
40.9	2.1759e-10
41	2.17896e-10
41.1	2.35901e-10
41.2	2.16827e-10
41.3	2.33765e-10
41.4	2.17743e-10
41.5	2.27509e-10
41.6	2.29034e-10
41.7	2.23846e-10
41.8	2.28729e-10
41.9	2.38495e-10
42	2.10724e-10
42.1	2.29797e-10
42.2	2.40631e-10
42.3	2.45361e-10
42.4	2.24762e-10
42.5	2.24915e-10
42.6	2.32239e-10
42.7	2.21252e-10
42.8	2.26746e-10
42.9	2.33612e-10
43	2.4231e-10
43.1	2.3056e-10
43.2	2.36053e-10
43.3	2.40479e-10
43.4	2.32239e-10
43.5	2.36969e-10
43.6	2.22626e-10
43.7	2.3407e-10
43.8	2.29034e-10
43.9	2.19421e-10
44	2.21863e-10
44.1	2.10724e-10
44.2	2.27356e-10
44.3	2.21863e-10
44.4	2.28271e-10
44.5	2.211e-10
44.6	2.44904e-10
44.7	2.14233e-10
44.8	2.40021e-10
44.9	2.18353e-10
45	2.21558e-10
45.1	2.30713e-10
45.2	2.39105e-10
45.3	2.32086e-10
45.4	2.27509e-10
45.5	2.20337e-10
45.6	2.28424e-10
45.7	2.36359e-10
45.8	2.16217e-10
45.9	2.23083e-10
46	2.24915e-10
46.1	2.47345e-10
46.2	2.16217e-10
46.3	2.0401e-10
46.4	2.20184e-10
46.5	2.52228e-10
46.6	2.1698e-10
46.7	2.15759e-10
46.8	2.39258e-10
46.9	2.36816e-10
47	2.33612e-10
47.1	2.18506e-10
47.2	2.33307e-10
47.3	2.24304e-10
47.4	2.25067e-10
47.5	2.20184e-10
47.6	2.31628e-10
47.7	2.48566e-10
47.8	2.3941e-10
47.9	2.30103e-10
48	2.22321e-10
48.1	2.23389e-10
48.2	2.2934e-10
48.3	2.1759e-10
48.4	2.43225e-10
48.5	2.29797e-10
48.6	2.29492e-10
48.7	2.33002e-10
48.8	2.2995e-10
48.9	2.03705e-10
49	1.9104e-10
49.1	2.21405e-10
49.2	2.3407e-10
49.3	2.25067e-10
49.4	2.3407e-10
49.5	2.17438e-10
49.6	2.31323e-10
49.7	2.19727e-10
49.8	2.43378e-10
49.9	2.11334e-10
50	2.27051e-10
50.1	2.37427e-10
50.2	2.2522e-10
50.3	2.34985e-10
50.4	2.34375e-10
50.5	2.27661e-10
50.6	2.03247e-10
50.7	2.16064e-10
50.8	2.43835e-10
50.9	2.34222e-10
51	2.29645e-10
51.1	2.08893e-10
51.2	2.03705e-10
51.3	2.22015e-10
51.4	2.36206e-10
51.5	2.29034e-10
51.6	2.35748e-10
51.7	2.0401e-10
51.8	2.24762e-10
51.9	2.29034e-10
52	2.19879e-10
52.1	2.36359e-10
52.2	2.40479e-10
52.3	2.34528e-10
52.4	2.19116e-10
52.5	2.50092e-10
52.6	2.14539e-10
52.7	2.24457e-10
52.8	2.37274e-10
52.9	2.09503e-10
53	2.14233e-10
53.1	2.20337e-10
53.2	2.28882e-10
53.3	2.36969e-10
53.4	2.20642e-10
53.5	2.45361e-10
53.6	2.22473e-10
53.7	2.19727e-10
53.8	2.25372e-10
53.9	2.36359e-10
54	2.13776e-10
54.1	2.36053e-10
54.2	2.41394e-10
54.3	2.33459e-10
54.4	2.2934e-10
54.5	2.20795e-10
54.6	2.17743e-10
54.7	2.06451e-10
54.8	2.3407e-10
54.9	2.14386e-10
55	2.26898e-10
55.1	2.0813e-10
55.2	2.25372e-10
55.3	2.15302e-10
55.4	2.24609e-10
55.5	2.17133e-10
55.6	2.27814e-10
55.7	2.33765e-10
55.8	2.39868e-10
55.9	2.16522e-10
56	2.26898e-10
56.1	2.17743e-10
56.2	2.2934e-10
56.3	2.18506e-10
56.4	2.41547e-10
56.5	2.05231e-10
56.6	2.21405e-10
56.7	2.16827e-10
56.8	2.2995e-10
56.9	2.35138e-10
57	2.14233e-10
57.1	2.23389e-10
57.2	2.19421e-10
57.3	2.18506e-10
57.4	2.16675e-10
57.5	2.41089e-10
57.6	2.38037e-10
57.7	2.24304e-10
57.8	2.33459e-10
57.9	2.17133e-10
58	2.16522e-10
58.1	2.23694e-10
58.2	2.36664e-10
58.3	2.00653e-10
58.4	2.02637e-10
58.5	2.16827e-10
58.6	2.28882e-10
58.7	2.23694e-10
58.8	2.06757e-10
58.9	2.3407e-10
59	2.39716e-10
59.1	2.27814e-10
59.2	2.24915e-10
59.3	2.33154e-10
59.4	2.10876e-10
59.5	2.21863e-10
59.6	2.1698e-10
59.7	2.23236e-10
59.8	2.20947e-10
59.9	2.21405e-10
60	2.35443e-10
60.1	2.18353e-10
60.2	2.28882e-10
60.3	2.18506e-10
60.4	2.2583e-10
60.5	2.1225e-10
60.6	2.23541e-10
60.7	2.09198e-10
60.8	2.33612e-10
60.9	2.22778e-10
61	2.23389e-10
61.1	2.32544e-10
61.2	2.32849e-10
61.3	2.21558e-10
61.4	2.25983e-10
61.5	2.42004e-10
61.6	2.21405e-10
61.7	2.20947e-10
61.8	2.25983e-10
61.9	2.42157e-10
62	2.45514e-10
62.1	2.43378e-10
62.2	2.27203e-10
62.3	2.36664e-10
62.4	2.20032e-10
62.5	2.0813e-10
62.6	2.27509e-10
62.7	2.00043e-10
62.8	2.2171e-10
62.9	2.30103e-10
63	2.11029e-10
63.1	2.4231e-10
63.2	2.07977e-10
63.3	2.15912e-10
63.4	2.29797e-10
63.5	2.25067e-10
63.6	2.12555e-10
63.7	2.1698e-10
63.8	2.13928e-10
63.9	2.30865e-10
64	2.01111e-10
64.1	2.13318e-10
64.2	2.2644e-10
64.3	2.13776e-10
64.4	2.01874e-10
64.5	2.27814e-10
64.6	2.2522e-10
64.7	2.19574e-10
64.8	2.07062e-10
64.9	2.39563e-10
65	2.1698e-10
65.1	2.15912e-10
65.2	2.49329e-10
65.3	2.05841e-10
65.4	2.19727e-10
65.5	2.22321e-10
65.6	2.2583e-10
65.7	2.2583e-10
65.8	2.1225e-10
65.9	2.2644e-10
66	2.16522e-10
66.1	2.22168e-10
66.2	2.42157e-10
66.3	2.36206e-10
66.4	2.211e-10
66.5	2.19421e-10
66.6	2.35901e-10
66.7	2.19574e-10
66.8	2.211e-10
66.9	2.3941e-10
67	2.24915e-10
67.1	2.06909e-10
67.2	2.31934e-10
67.3	2.15607e-10
67.4	2.0874e-10
67.5	2.34528e-10
67.6	2.2522e-10
67.7	2.28424e-10
67.8	2.211e-10
67.9	2.07825e-10
68	2.04468e-10
68.1	2.27814e-10
68.2	2.16675e-10
68.3	2.05688e-10
68.4	2.44751e-10
68.5	2.02637e-10
68.6	2.22626e-10
68.7	2.13776e-10
68.8	2.31476e-10
68.9	2.18353e-10
69	2.16522e-10
69.1	2.28882e-10
69.2	2.14233e-10
69.3	2.36359e-10
69.4	2.19269e-10
69.5	1.96686e-10
69.6	2.05536e-10
69.7	2.20032e-10
69.8	2.04926e-10
69.9	2.22778e-10
70	2.22473e-10
70.1	2.29492e-10
70.2	2.31934e-10
70.3	2.1637e-10
70.4	1.95923e-10
70.5	2.26288e-10
70.6	2.18964e-10
70.7	2.0462e-10
70.8	2.35443e-10
70.9	2.30255e-10
71	2.10419e-10
71.1	2.32849e-10
71.2	2.37732e-10
71.3	2.42157e-10
71.4	2.2522e-10
71.5	2.24152e-10
71.6	2.22168e-10
71.7	2.18353e-10
71.8	2.18658e-10
71.9	2.24762e-10
72	2.3819e-10
72.1	1.9577e-10
72.2	2.3056e-10
72.3	2.39868e-10
72.4	2.10724e-10
72.5	2.09351e-10
72.6	2.20337e-10
72.7	2.28271e-10
72.8	2.1286e-10
72.9	2.17896e-10
73	2.27814e-10
73.1	2.18048e-10
73.2	2.00806e-10
73.3	2.26135e-10
73.4	2.1637e-10
73.5	2.28729e-10
73.6	2.12402e-10
73.7	2.24609e-10
73.8	2.00043e-10
73.9	2.1698e-10
74	2.36053e-10
74.1	2.2934e-10
74.2	2.17438e-10
74.3	2.05994e-10
74.4	2.37122e-10
74.5	2.19879e-10
74.6	2.33307e-10
74.7	2.2644e-10
74.8	2.20947e-10
74.9	2.18048e-10
75	2.16064e-10
75.1	2.23999e-10
75.2	2.25372e-10
75.3	2.1286e-10
75.4	2.20795e-10
75.5	2.04163e-10
75.6	2.1637e-10
75.7	2.30103e-10
75.8	2.10419e-10
75.9	2.09045e-10
76	2.16827e-10
76.1	2.23999e-10
76.2	2.20032e-10
76.3	2.23694e-10
76.4	2.37885e-10
76.5	2.31781e-10
76.6	2.11487e-10
76.7	2.04468e-10
76.8	2.1347e-10
76.9	2.31323e-10
77	2.14233e-10
77.1	2.09808e-10
77.2	2.20642e-10
77.3	2.4292e-10
77.4	2.28577e-10
77.5	2.13013e-10
77.6	2.10724e-10
77.7	2.14844e-10
77.8	2.32544e-10
77.9	2.30408e-10
78	2.25525e-10
78.1	2.18353e-10
78.2	2.00195e-10
78.3	2.27966e-10
78.4	2.07672e-10
78.5	2.11029e-10
78.6	2.211e-10
78.7	2.29034e-10
78.8	2.14386e-10
78.9	2.28271e-10
79	2.1759e-10
79.1	2.17133e-10
79.2	2.16064e-10
79.3	2.0874e-10
79.4	2.05536e-10
79.5	2.1637e-10
79.6	2.25372e-10
79.7	2.21558e-10
79.8	2.17896e-10
79.9	2.09045e-10
80	2.02332e-10
80.1	2.00806e-10
80.2	2.28882e-10
80.3	2.22778e-10
80.4	2.11334e-10
80.5	2.16522e-10
80.6	2.18353e-10
80.7	2.15302e-10
80.8	2.2522e-10
80.9	2.23694e-10
81	2.17896e-10
81.1	2.07214e-10
81.2	2.41241e-10
81.3	2.26135e-10
81.4	2.12708e-10
81.5	2.25677e-10
81.6	2.32849e-10
81.7	2.31934e-10
81.8	2.09808e-10
81.9	2.28882e-10
82	2.15454e-10
82.1	2.16675e-10
82.2	2.21863e-10
82.3	2.12555e-10
82.4	2.2171e-10
82.5	2.23083e-10
82.6	2.07672e-10
82.7	2.27661e-10
82.8	2.14844e-10
82.9	2.23694e-10
83	2.25372e-10
83.1	2.46277e-10
83.2	2.08282e-10
83.3	2.23083e-10
83.4	2.23083e-10
83.5	2.2522e-10
83.6	2.25372e-10
83.7	2.03552e-10
83.8	2.26746e-10
83.9	2.29797e-10
84	2.18964e-10
84.1	2.21558e-10
84.2	2.17133e-10
84.3	1.98059e-10
84.4	2.20947e-10
84.5	2.12555e-10
84.6	2.09808e-10
84.7	2.13165e-10
84.8	2.2171e-10
84.9	2.034e-10
85	2.24457e-10
85.1	2.01874e-10
85.2	2.211e-10
85.3	2.13318e-10
85.4	2.2934e-10
85.5	2.10724e-10
85.6	2.3056e-10
85.7	2.2583e-10
85.8	2.07367e-10
85.9	2.19574e-10
86	2.1225e-10
86.1	2.19574e-10
86.2	2.25372e-10
86.3	2.15149e-10
86.4	2.02789e-10
86.5	2.38342e-10
86.6	2.10876e-10
86.7	2.09198e-10
86.8	2.16827e-10
86.9	2.13318e-10
87	2.26898e-10
87.1	2.22168e-10
87.2	1.96533e-10
87.3	2.09808e-10
87.4	2.1286e-10
87.5	2.11334e-10
87.6	2.27203e-10
87.7	2.33002e-10
87.8	2.12402e-10
87.9	2.09808e-10
88	2.35443e-10
88.1	2.22015e-10
88.2	2.15149e-10
88.3	2.17285e-10
88.4	2.18658e-10
88.5	2.23236e-10
88.6	2.16827e-10
88.7	2.21405e-10
88.8	2.10266e-10
88.9	2.2934e-10
89	2.07672e-10
89.1	2.27203e-10
89.2	1.99585e-10
89.3	2.04163e-10
89.4	2.13623e-10
89.5	1.9989e-10
89.6	2.2171e-10
89.7	2.29645e-10
89.8	1.93329e-10
89.9	2.05231e-10
90	2.11639e-10
90.1	2.19574e-10
90.2	2.20184e-10
90.3	2.09198e-10
90.4	2.23846e-10
90.5	2.12402e-10
90.6	2.02789e-10
90.7	2.18658e-10
90.8	2.14691e-10
90.9	2.15607e-10
91	2.26898e-10
91.1	2.05536e-10
91.2	2.14844e-10
91.3	2.16522e-10
91.4	2.17743e-10
91.5	2.14081e-10
91.6	2.09198e-10
91.7	1.8219e-10
91.8	2.30408e-10
91.9	2.1759e-10
92	2.04163e-10
92.1	2.27814e-10
92.2	2.3056e-10
92.3	2.04315e-10
92.4	2.19116e-10
92.5	2.16064e-10
92.6	2.06146e-10
92.7	2.25677e-10
92.8	1.95312e-10
92.9	2.11334e-10
93	2.07062e-10
93.1	2.12097e-10
93.2	2.08588e-10
93.3	2.09198e-10
93.4	2.25525e-10
93.5	2.14081e-10
93.6	2.01416e-10
93.7	2.30713e-10
93.8	2.13318e-10
93.9	2.05231e-10
94	2.11487e-10
94.1	2.05383e-10
94.2	2.29034e-10
94.3	2.33307e-10
94.4	2.03857e-10
94.5	2.28882e-10
94.6	2.15454e-10
94.7	2.16675e-10
94.8	2.20184e-10
94.9	2.26898e-10
95	2.13013e-10
95.1	2.0752e-10
95.2	2.1637e-10
95.3	2.14539e-10
95.4	2.10266e-10
95.5	2.0874e-10
95.6	2.06757e-10
95.7	2.22473e-10
95.8	2.09503e-10
95.9	1.94092e-10
96	2.0813e-10
96.1	2.22473e-10
96.2	1.97601e-10
96.3	2.17896e-10
96.4	2.05231e-10
96.5	2.03247e-10
96.6	2.23999e-10
96.7	2.2049e-10
96.8	2.0752e-10
96.9	2.25677e-10
97	2.28729e-10
97.1	1.98364e-10
97.2	2.23846e-10
97.3	2.22778e-10
97.4	1.94397e-10
97.5	2.19727e-10
97.6	2.15149e-10
97.7	2.09656e-10
97.8	2.09045e-10
97.9	2.09808e-10
98	2.12402e-10
98.1	2.05231e-10
98.2	2.11639e-10
98.3	2.05078e-10
98.4	2.37885e-10
98.5	1.87378e-10
98.6	2.17438e-10
98.7	2.17133e-10
98.8	2.16675e-10
98.9	2.04468e-10
99	2.13623e-10
99.1	2.20947e-10
99.2	2.22321e-10
99.3	2.1347e-10
99.4	2.20184e-10
99.5	1.90125e-10
99.6	2.01721e-10
99.7	2.23541e-10
99.8	2.14386e-10
99.9	2.13013e-10
100	2.14386e-10
100.1	2.02026e-10
100.2	2.17743e-10
100.3	2.11182e-10
100.4	2.16064e-10
100.5	2.18201e-10
100.6	2.11945e-10
100.7	2.25372e-10
100.8	2.06757e-10
100.9	2.11945e-10
101	2.10266e-10
101.1	1.9577e-10
101.2	2.18811e-10
101.3	2.11029e-10
101.4	2.02484e-10
101.5	2.02179e-10
101.6	2.35901e-10
101.7	2.18811e-10
101.8	2.00348e-10
101.9	2.06909e-10
102	2.12555e-10
102.1	2.16064e-10
102.2	2.19421e-10
102.3	2.11182e-10
102.4	2.14233e-10
102.5	2.20642e-10
102.6	2.10571e-10
102.7	2.20032e-10
102.8	2.12402e-10
102.9	1.8219e-10
103	2.21252e-10
103.1	2.29187e-10
103.2	2.15759e-10
103.3	2.06757e-10
103.4	1.87683e-10
103.5	2.07062e-10
103.6	2.14996e-10
103.7	2.11792e-10
103.8	2.17896e-10
103.9	2.14386e-10
104	2.11487e-10
104.1	1.97754e-10
104.2	2.17285e-10
104.3	2.01569e-10
104.4	1.83868e-10
104.5	1.94702e-10
104.6	2.18811e-10
104.7	1.97449e-10
104.8	2.09961e-10
104.9	1.84631e-10
105	1.92719e-10
105.1	2.2171e-10
105.2	1.90887e-10
105.3	1.76239e-10
105.4	1.74866e-10
105.5	1.66016e-10
105.6	1.63574e-10
105.7	1.87988e-10
105.8	1.89972e-10
105.9	1.81274e-10
106	2.14386e-10
106.1	1.77002e-10
106.2	2.27814e-10
106.3	2.37732e-10
106.4	2.00806e-10
106.5	2.1225e-10
106.6	1.97601e-10
106.7	2.01569e-10
106.8	2.1347e-10
106.9	1.99127e-10
107	2.04926e-10
107.1	2.21252e-10
107.2	2.12097e-10
107.3	2.88544e-10
107.4	2.18353e-10
107.5	2.1347e-10
107.6	2.22168e-10
107.7	2.11334e-10
107.8	1.94244e-10
107.9	1.96381e-10
108	2.3468e-10
108.1	2.2583e-10
108.2	2.14233e-10
108.3	2.15607e-10
108.4	2.40173e-10
108.5	2.86865e-10
108.6	2.211e-10
108.7	2.25677e-10
108.8	2.52228e-10
108.9	2.28424e-10
109	1.9928e-10
109.1	1.81122e-10
109.2	2.06146e-10
109.3	1.89667e-10
109.4	1.00555e-10
109.5	2.4231e-10
109.6	2.09656e-10
109.7	1.69678e-10
109.8	1.48621e-10
109.9	1.48621e-10
110	1.72577e-10
110.1	2.10114e-10
110.2	1.84021e-10
110.3	3.35693e-10
110.4	2.21558e-10
110.5	1.9165e-10
110.6	1.88751e-10
110.7	1.7868e-10
110.8	1.81274e-10
110.9	1.83868e-10
111	2.13776e-10
111.1	2.05994e-10
111.2	2.06146e-10
111.3	1.98212e-10
111.4	2.0813e-10
111.5	1.97601e-10
111.6	2.06299e-10
111.7	2.1698e-10
111.8	1.98517e-10
111.9	2.08282e-10
112	2.16675e-10
112.1	2.06146e-10
112.2	1.89056e-10
112.3	2.14539e-10
112.4	1.93176e-10
112.5	2.16522e-10
112.6	1.93787e-10
112.7	1.9043e-10
112.8	2.06299e-10
112.9	2.0813e-10
113	2.08588e-10
113.1	2.1759e-10
113.2	2.0401e-10
113.3	2.04773e-10
113.4	2.11945e-10
113.5	1.84479e-10
113.6	2.47955e-10
113.7	1.82495e-10
113.8	2.27509e-10
113.9	2.37885e-10
114	2.15607e-10
114.1	2.0401e-10
114.2	2.30865e-10
114.3	2.07062e-10
114.4	2.11792e-10
114.5	2.10724e-10
114.6	2.31781e-10
114.7	1.89209e-10
114.8	1.80817e-10
114.9	1.97296e-10
115	2.08282e-10
115.1	-7.91931e-11
115.2	5.33447e-10
115.3	2.61536e-10
115.4	2.38037e-10
115.5	2.21252e-10
115.6	2.07825e-10
115.7	2.05841e-10
115.8	2.18658e-10
115.9	2.01416e-10
116	2.07977e-10
116.1	2.07977e-10
116.2	2.14233e-10
116.3	2.14844e-10
116.4	2.19727e-10
116.5	2.21558e-10
116.6	2.02026e-10
116.7	2.12097e-10
116.8	2.1637e-10
116.9	2.05078e-10
117	2.41852e-10
117.1	2.02484e-10
117.2	1.94855e-10
117.3	2.11792e-10
117.4	1.98822e-10
117.5	1.93787e-10
117.6	2.23694e-10
117.7	2.0874e-10
117.8	2.02026e-10
117.9	2.06757e-10
118	2.00043e-10
118.1	1.94702e-10
118.2	2.16675e-10
118.3	2.0752e-10
118.4	1.9516e-10
118.5	2.27661e-10
118.6	2.02942e-10
118.7	1.90125e-10
118.8	2.005e-10
118.9	2.11639e-10
119	2.15149e-10
119.1	1.94702e-10
119.2	2.09808e-10
119.3	1.92566e-10
119.4	2.01111e-10
119.5	2.29492e-10
119.6	2.11792e-10
119.7	2.18658e-10
119.8	2.10266e-10
119.9	2.45209e-10
120	2.04468e-10
120.1	2.6062e-10
120.2	2.3056e-10
120.3	2.03247e-10
120.4	1.93024e-10
120.5	2.06146e-10
120.6	2.06451e-10
120.7	1.83258e-10
120.8	1.8219e-10
120.9	1.87378e-10
121	2.17743e-10
121.1	1.94855e-10
121.2	1.87225e-10
121.3	1.99738e-10
121.4	2.16522e-10
121.5	2.01111e-10
121.6	1.98975e-10
121.7	2.09045e-10
121.8	2.08588e-10
121.9	1.94397e-10
122	1.92413e-10
122.1	2.01874e-10
122.2	2.17438e-10
122.3	2.03094e-10
122.4	1.95465e-10
122.5	2.00195e-10
122.6	1.83563e-10
122.7	2.02026e-10
122.8	1.89514e-10
122.9	2.00195e-10
123	2.11029e-10
123.1	1.86615e-10
123.2	1.82953e-10
123.3	1.93329e-10
123.4	2.04773e-10
123.5	2.03094e-10
123.6	2.00958e-10
123.7	1.88904e-10
123.8	1.9989e-10
123.9	2.10266e-10
124	1.88751e-10
124.1	1.81732e-10
124.2	1.83868e-10
124.3	1.9165e-10
124.4	2.02179e-10
124.5	1.88904e-10
124.6	2.16827e-10
124.7	2.1286e-10
124.8	1.99738e-10
124.9	2.28424e-10
125	1.95007e-10
125.1	1.91193e-10
125.2	2.17285e-10
125.3	2.35748e-10
125.4	1.97144e-10
125.5	1.7807e-10
125.6	1.55029e-10
125.7	2.22473e-10
125.8	2.005e-10
125.9	1.85089e-10
126	1.87683e-10
126.1	1.81732e-10
126.2	2.09198e-10
126.3	2.46429e-10
126.4	2.23541e-10
126.5	2.34222e-10
126.6	2.18353e-10
126.7	2.21405e-10
126.8	1.96075e-10
126.9	1.94702e-10
127	2.35138e-10
127.1	2.14691e-10
127.2	2.05841e-10
127.3	2.25983e-10
127.4	2.23541e-10
127.5	2.25677e-10
127.6	2.28882e-10
127.7	2.21558e-10
127.8	2.24762e-10
127.9	2.1286e-10
128	2.16064e-10
128.1	2.17438e-10
128.2	2.13013e-10
128.3	2.22168e-10
128.4	2.02789e-10
128.5	2.0874e-10
128.6	1.97906e-10
128.7	2.13013e-10
128.8	2.19879e-10
128.9	2.21558e-10
129	2.11792e-10
129.1	2.07214e-10
129.2	2.06604e-10
129.3	2.02179e-10
129.4	2.25525e-10
129.5	1.98364e-10
129.6	1.99738e-10
129.7	2.10876e-10
129.8	2.25525e-10
129.9	1.98517e-10
130	2.05841e-10
130.1	1.98517e-10
130.2	2.09045e-10
130.3	1.87073e-10
130.4	2.13623e-10
130.5	1.96533e-10
130.6	2.08282e-10
130.7	2.03857e-10
130.8	2.40784e-10
130.9	1.9455e-10
131	1.96075e-10
131.1	2.07672e-10
131.2	2.0401e-10
131.3	2.01263e-10
131.4	2.33154e-10
131.5	2.08893e-10
131.6	2.20795e-10
131.7	1.99432e-10
131.8	1.83411e-10
131.9	1.87988e-10
132	2.05383e-10
132.1	2.3407e-10
132.2	2.0462e-10
132.3	2.13013e-10
132.4	1.9165e-10
132.5	2.03705e-10
132.6	2.15302e-10
132.7	1.98059e-10
132.8	1.89362e-10
132.9	2.06909e-10
133	2.08588e-10
133.1	2.12097e-10
133.2	1.9165e-10
133.3	2.01569e-10
133.4	1.9455e-10
133.5	2.19574e-10
133.6	1.94702e-10
133.7	2.10724e-10
133.8	2.03247e-10
133.9	2.17743e-10
134	2.08435e-10
134.1	2.00348e-10
134.2	2.06299e-10
134.3	1.97601e-10
134.4	1.85547e-10
134.5	2.09045e-10
134.6	2.18658e-10
134.7	2.13165e-10
134.8	2.11945e-10
134.9	2.02789e-10
135	1.87836e-10
135.1	1.88141e-10
135.2	2.13928e-10
135.3	2.09045e-10
135.4	2.11945e-10
135.5	2.09351e-10
135.6	2.0401e-10
135.7	1.91803e-10
135.8	1.89209e-10
135.9	2.02484e-10
136	2.10571e-10
136.1	2.06757e-10
136.2	2.06604e-10
136.3	2.13928e-10
136.4	2.02637e-10
136.5	2.01874e-10
136.6	1.87073e-10
136.7	1.8631e-10
136.8	1.88293e-10
136.9	2.11334e-10
137	1.96991e-10
137.1	1.95465e-10
137.2	1.87836e-10
137.3	1.87378e-10
137.4	2.19421e-10
137.5	1.96228e-10
137.6	1.93481e-10
137.7	2.09351e-10
137.8	1.85699e-10
137.9	2.04773e-10
138	2.03247e-10
138.1	2.16827e-10
138.2	1.96381e-10
138.3	1.87073e-10
138.4	1.89819e-10
138.5	2.02484e-10
138.6	2.08435e-10
138.7	1.95618e-10
138.8	1.93634e-10
138.9	1.89514e-10
139	2.09503e-10
139.1	1.88141e-10
139.2	2.01263e-10
139.3	1.88599e-10
139.4	1.88293e-10
139.5	1.95923e-10
139.6	1.81885e-10
139.7	1.83258e-10
139.8	2.02942e-10
139.9	1.97144e-10
140	2.07977e-10
140.1	2.05688e-10
140.2	2.02484e-10
140.3	1.99127e-10
140.4	1.83868e-10
140.5	1.97449e-10
140.6	1.86462e-10
140.7	1.96381e-10
140.8	1.91345e-10
140.9	1.8692e-10
141	2.02179e-10
141.1	2.00806e-10
141.2	1.86768e-10
141.3	1.89514e-10
141.4	2.06604e-10
141.5	2.01721e-10
141.6	1.9577e-10
141.7	2.14691e-10
141.8	2.05231e-10
141.9	1.83105e-10
142	2.11945e-10
142.1	1.92719e-10
142.2	1.77002e-10
142.3	1.90582e-10
142.4	2.05383e-10
142.5	2.02484e-10
142.6	1.96686e-10
142.7	1.9043e-10
142.8	1.97601e-10
142.9	1.91345e-10
143	2.14691e-10
143.1	1.94244e-10
143.2	2.09808e-10
143.3	1.87836e-10
143.4	2.07977e-10
143.5	1.88293e-10
143.6	1.69525e-10
143.7	1.95923e-10
143.8	2.03705e-10
143.9	2.07062e-10
144	1.88446e-10
144.1	2.04468e-10
144.2	2.07062e-10
144.3	1.91193e-10
144.4	2.05231e-10
144.5	2.01569e-10
144.6	1.85852e-10
144.7	1.93329e-10
144.8	2.03857e-10
144.9	1.97601e-10
145	1.96838e-10
145.1	1.85394e-10
145.2	1.89819e-10
145.3	1.9928e-10
145.4	1.88293e-10
145.5	1.79291e-10
145.6	1.90277e-10
145.7	1.80511e-10
145.8	1.72119e-10
145.9	1.87531e-10
146	1.61743e-10
146.1	1.5686e-10
146.2	1.68457e-10
146.3	1.10779e-10
146.4	3.25012e-11
146.5	4.22668e-11
146.6	1.30005e-10
146.7	1.57318e-10
146.8	1.6571e-10
146.9	2.03857e-10
147	1.88751e-10
147.1	1.87225e-10
147.2	4.06494e-10
147.3	2.28271e-10
147.4	1.80054e-11
147.5	3.45459e-10
147.6	2.49176e-10
147.7	2.33917e-10
147.8	1.97754e-10
147.9	2.23083e-10
148	2.29797e-10
148.1	2.05994e-10
148.2	1.89056e-10
148.3	1.70288e-10
148.4	1.90735e-10
148.5	1.96228e-10
148.6	2.04468e-10
148.7	2.12097e-10
148.8	1.96991e-10
148.9	2.07977e-10
149	3.07922e-10
149.1	2.14233e-10
149.2	1.60217e-10
149.3	1.9104e-10
149.4	2.06909e-10
149.5	1.81885e-10
149.6	1.67542e-10
149.7	1.82343e-10
149.8	1.65863e-10
149.9	1.68304e-10
150	1.99432e-10
150.1	1.94702e-10
150.2	1.75171e-10
150.3	1.86005e-10
150.4	1.91345e-10
150.5	1.84174e-10
150.6	1.94855e-10
150.7	1.67542e-10
150.8	1.79596e-10
150.9	1.59912e-10
151	1.78375e-10
151.1	1.73645e-10
151.2	1.56097e-10
151.3	1.88293e-10
151.4	1.86005e-10
151.5	1.74255e-10
151.6	1.81274e-10
151.7	1.51367e-10
151.8	1.77765e-10
151.9	1.77765e-10
152	1.94397e-10
152.1	1.71204e-10
152.2	1.71967e-10
152.3	1.87531e-10
152.4	1.77765e-10
152.5	1.61896e-10
152.6	1.66626e-10
152.7	1.81122e-10
152.8	1.73645e-10
152.9	1.64337e-10
153	1.72729e-10
153.1	1.75171e-10
153.2	1.87836e-10
153.3	1.75171e-10
153.4	1.83716e-10
153.5	2.0462e-10
153.6	1.84784e-10
153.7	2.57111e-10
153.8	2.02789e-10
153.9	1.78986e-10
154	2.07214e-10
154.1	2.09961e-10
154.2	1.91345e-10
154.3	1.84479e-10
154.4	1.93787e-10
154.5	1.72119e-10
154.6	1.89819e-10
154.7	1.73645e-10
154.8	1.77917e-10
154.9	1.79291e-10
155	1.91956e-10
155.1	1.93787e-10
155.2	1.80817e-10
155.3	1.91956e-10
155.4	1.91956e-10
155.5	2.16522e-10
155.6	1.97601e-10
155.7	1.98517e-10
155.8	1.85852e-10
155.9	1.92871e-10
156	1.73492e-10
156.1	1.81885e-10
156.2	1.78833e-10
156.3	1.91345e-10
156.4	1.79749e-10
156.5	1.84937e-10
156.6	1.96075e-10
156.7	2.02484e-10
156.8	1.6983e-10
156.9	1.90277e-10
157	2.33459e-10
157.1	1.87225e-10
157.2	2.13013e-10
157.3	1.99738e-10
157.4	1.79443e-10
157.5	2.2995e-10
157.6	1.9989e-10
157.7	1.64185e-10
157.8	1.55945e-10
157.9	1.7395e-10
158	1.94855e-10
158.1	1.72882e-10
158.2	2.05841e-10
158.3	1.65863e-10
158.4	1.58844e-10
158.5	1.98364e-10
158.6	2.04315e-10
158.7	1.95923e-10
158.8	2.13776e-10
158.9	1.84021e-10
159	2.14844e-10
159.1	2.66266e-10
159.2	2.63367e-10
159.3	2.25983e-10
159.4	2.31018e-10
159.5	2.02942e-10
159.6	2.20795e-10
159.7	1.89972e-10
159.8	2.22015e-10
159.9	2.20795e-10
160	2.01111e-10
160.1	1.90887e-10
160.2	2.0462e-10
160.3	2.00806e-10
160.4	2.34985e-10
160.5	2.19116e-10
160.6	2.14691e-10
160.7	2.17285e-10
160.8	2.30103e-10
160.9	2.21252e-10
161	1.96533e-10
161.1	2.32086e-10
161.2	2.24152e-10
161.3	2.01721e-10
161.4	2.21558e-10
161.5	2.18964e-10
161.6	2.23541e-10
161.7	2.13623e-10
161.8	2.27509e-10
161.9	2.16522e-10
162	2.20337e-10
162.1	2.4292e-10
162.2	2.36511e-10
162.3	2.24915e-10
162.4	2.27356e-10
162.5	2.39105e-10
162.6	2.31934e-10
162.7	2.31628e-10
162.8	2.28729e-10
162.9	2.17438e-10
163	2.22778e-10
163.1	2.4353e-10
163.2	2.5528e-10
163.3	2.42004e-10
163.4	2.40021e-10
163.5	2.3941e-10
163.6	2.41852e-10
163.7	2.38037e-10
163.8	2.63214e-10
163.9	2.34375e-10
164	2.49481e-10
164.1	2.51923e-10
164.2	2.33307e-10
164.3	2.63519e-10
164.4	2.57568e-10
164.5	2.48718e-10
164.6	2.47498e-10
164.7	2.51465e-10
164.8	2.49786e-10
164.9	2.5528e-10
165	2.53296e-10
165.1	2.34985e-10
165.2	2.60925e-10
165.3	2.41699e-10
165.4	2.47192e-10
165.5	2.53143e-10
165.6	2.54822e-10
165.7	2.38647e-10
165.8	2.61383e-10
165.9	2.59552e-10
166	2.56653e-10
166.1	2.39868e-10
166.2	2.40173e-10
166.3	2.76489e-10
166.4	2.25983e-10
166.5	2.70691e-10
166.6	2.46887e-10
166.7	2.82135e-10
166.8	2.77252e-10
166.9	2.55432e-10
167	2.6062e-10
167.1	2.70233e-10
167.2	2.74658e-10
167.3	2.72827e-10
167.4	2.70081e-10
167.5	2.72522e-10
167.6	2.72217e-10
167.7	2.86102e-10
167.8	2.89459e-10
167.9	2.94495e-10
168	2.86713e-10
168.1	2.61688e-10
168.2	2.86407e-10
168.3	2.80609e-10
168.4	2.742e-10
168.5	2.87323e-10
168.6	2.61078e-10
168.7	2.72217e-10
168.8	3.02277e-10
168.9	2.87476e-10
169	2.88696e-10
169.1	2.9953e-10
169.2	3.0838e-10
169.3	2.96478e-10
169.4	2.93121e-10
169.5	2.83356e-10
169.6	3.05328e-10
169.7	2.98767e-10
169.8	2.99377e-10
169.9	3.0304e-10
170	2.90833e-10
170.1	3.14636e-10
170.2	2.8595e-10
170.3	2.95563e-10
170.4	2.94342e-10
170.5	3.302e-10
170.6	3.16162e-10
170.7	3.17078e-10
170.8	3.14941e-10
170.9	3.28674e-10
171	3.34778e-10
171.1	3.15399e-10
171.2	3.22571e-10
171.3	3.3493e-10
171.4	3.20435e-10
171.5	3.24402e-10
171.6	3.42712e-10
171.7	3.2196e-10
171.8	3.43323e-10
171.9	3.42865e-10
172	3.30811e-10
172.1	3.45917e-10
172.2	3.60718e-10
172.3	3.6499e-10
172.4	3.45459e-10
172.5	3.53241e-10
172.6	3.44086e-10
172.7	3.52631e-10
172.8	3.59802e-10
172.9	3.6377e-10
173	3.41187e-10
173.1	3.55682e-10
173.2	3.5675e-10
173.3	3.71246e-10
173.4	3.78418e-10
173.5	3.91083e-10
173.6	3.7735e-10
173.7	3.7323e-10
173.8	3.84979e-10
173.9	3.9505e-10
174	3.86505e-10
174.1	3.85895e-10
174.2	4.07104e-10
174.3	4.00696e-10
174.4	4.08936e-10
174.5	4.11987e-10
174.6	4.06036e-10
174.7	4.01459e-10
174.8	4.28925e-10
174.9	4.23584e-10
175	4.14581e-10
175.1	4.34418e-10
175.2	4.26025e-10
175.3	4.29687e-10
175.4	4.47235e-10
175.5	4.42047e-10
175.6	4.10309e-10
175.7	4.19159e-10
175.8	4.43726e-10
175.9	4.55322e-10
176	4.61426e-10
176.1	4.55933e-10
176.2	4.57611e-10
176.3	4.77448e-10
176.4	4.65546e-10
176.5	4.64478e-10
176.6	4.74854e-10
176.7	4.71497e-10
176.8	4.76074e-10
176.9	4.62494e-10
177	4.82788e-10
177.1	4.96826e-10
177.2	4.92554e-10
177.3	4.92554e-10
177.4	5.09186e-10
177.5	5.03387e-10
177.6	5.1178e-10
177.7	5.25055e-10
177.8	5.08118e-10
177.9	5.22614e-10
178	5.10712e-10
178.1	5.39703e-10
178.2	5.39398e-10
178.3	5.43671e-10
178.4	5.43365e-10
178.5	5.47485e-10
178.6	5.59082e-10
178.7	5.78003e-10
178.8	5.78003e-10
178.9	5.77545e-10
179	5.84564e-10
179.1	5.7312e-10
179.2	5.72052e-10
179.3	5.86548e-10
179.4	5.96313e-10
179.5	5.96466e-10
179.6	6.07758e-10
179.7	6.25458e-10
179.8	6.00433e-10
179.9	6.17828e-10
180	6.1615e-10
180.1	6.30646e-10
180.2	6.29883e-10
180.3	6.26526e-10
180.4	6.4682e-10
180.5	6.61011e-10
180.6	6.52466e-10
180.7	6.70319e-10
180.8	6.48804e-10
180.9	6.84052e-10
181	6.78101e-10
181.1	6.90918e-10
181.2	6.9397e-10
181.3	6.99463e-10
181.4	6.90308e-10
181.5	7.13959e-10
181.6	7.11517e-10
181.7	7.2937e-10
181.8	7.46002e-10
181.9	7.33185e-10
182	7.33337e-10
182.1	7.48901e-10
182.2	7.32574e-10
182.3	7.57446e-10
182.4	7.5592e-10
182.5	7.43713e-10
182.6	7.67365e-10
182.7	7.69806e-10
182.8	7.5943e-10
182.9	7.83997e-10
183	7.89795e-10
183.1	7.96356e-10
183.2	7.81555e-10
183.3	7.93915e-10
183.4	8.1192e-10
183.5	8.04596e-10
183.6	8.17566e-10
183.7	8.29926e-10
183.8	8.33435e-10
183.9	8.62427e-10
184	8.45032e-10
184.1	8.62274e-10
184.2	8.74939e-10
184.3	8.5556e-10
184.4	8.68073e-10
184.5	8.7326e-10
184.6	8.68225e-10
184.7	9.1568e-10
184.8	9.0271e-10
184.9	8.92181e-10
185	9.02252e-10
185.1	9.17358e-10
185.2	9.14764e-10
185.3	9.24835e-10
185.4	9.20258e-10
185.5	9.19189e-10
185.6	9.59473e-10
185.7	9.26056e-10
185.8	9.4223e-10
185.9	9.60236e-10
186	9.65881e-10
186.1	9.5993e-10
186.2	9.81445e-10
186.3	9.75189e-10
186.4	9.96857e-10
186.5	1.00555e-09
186.6	1.01852e-09
186.7	1.00937e-09
186.8	9.9884e-10
186.9	1.00296e-09
187	1.03668e-09
187.1	1.03165e-09
187.2	1.0199e-09
187.3	1.0434e-09
187.4	1.05515e-09
187.5	1.05377e-09
187.6	1.06598e-09
187.7	1.05301e-09
187.8	1.06003e-09
187.9	1.07574e-09
188	1.10321e-09
188.1	1.09344e-09
188.2	1.08826e-09
188.3	1.1058e-09
188.4	1.11206e-09
188.5	1.11343e-09
188.6	1.11603e-09
188.7	1.11679e-09
188.8	1.12167e-09
188.9	1.13708e-09
189	1.13525e-09
189.1	1.15768e-09
189.2	1.1261e-09
189.3	1.1554e-09
189.4	1.16959e-09
189.5	1.16486e-09
189.6	1.16318e-09
189.7	1.1972e-09
189.8	1.18256e-09
189.9	1.21201e-09
190	1.20071e-09
190.1	1.22757e-09
190.2	1.22635e-09
190.3	1.23032e-09
190.4	1.22696e-09
190.5	1.23032e-09
190.6	1.2558e-09
190.7	1.23962e-09
190.8	1.25244e-09
190.9	1.28113e-09
191	1.26221e-09
191.1	1.27304e-09
191.2	1.2796e-09
191.3	1.28204e-09
191.4	1.27457e-09
191.5	1.29105e-09
191.6	1.27243e-09
191.7	1.28098e-09
191.8	1.29349e-09
191.9	1.31226e-09
192	1.32324e-09
192.1	1.29456e-09
192.2	1.32935e-09
192.3	1.34094e-09
192.4	1.34109e-09
192.5	1.36185e-09
192.6	1.32904e-09
192.7	1.35849e-09
192.8	1.3559e-09
192.9	1.36078e-09
193	1.371e-09
193.1	1.38748e-09
193.2	1.36902e-09
193.3	1.38412e-09
193.4	1.38519e-09
193.5	1.39633e-09
193.6	1.41098e-09
193.7	1.41876e-09
193.8	1.39633e-09
193.9	1.42883e-09
194	1.40228e-09
194.1	1.43799e-09
194.2	1.41312e-09
194.3	1.43585e-09
194.4	1.43036e-09
194.5	1.44516e-09
194.6	1.44135e-09
194.7	1.4679e-09
194.8	1.4682e-09
194.9	1.46332e-09
195	1.46118e-09
195.1	1.44684e-09
195.2	1.47308e-09
195.3	1.46835e-09
195.4	1.48499e-09
195.5	1.5004e-09
195.6	1.50604e-09
195.7	1.47964e-09
195.8	1.4975e-09
195.9	1.50833e-09
196	1.51276e-09
196.1	1.51306e-09
196.2	1.51108e-09
196.3	1.49963e-09
196.4	1.53244e-09
196.5	1.52222e-09
196.6	1.55212e-09
196.7	1.52924e-09
196.8	1.53824e-09
196.9	1.54144e-09
197	1.54663e-09
197.1	1.54205e-09
197.2	1.53534e-09
197.3	1.55853e-09
197.4	1.56677e-09
197.5	1.56265e-09
197.6	1.56998e-09
197.7	1.5799e-09
197.8	1.58157e-09
197.9	1.58798e-09
198	1.6066e-09
198.1	1.5834e-09
198.2	1.58981e-09
198.3	1.59714e-09
198.4	1.59195e-09
198.5	1.58783e-09
198.6	1.60599e-09
198.7	1.61728e-09
198.8	1.62369e-09
198.9	1.62354e-09
199	1.60934e-09
199.1	1.62476e-09
199.2	1.65054e-09
199.3	1.62033e-09
199.4	1.62872e-09
199.5	1.62201e-09
199.6	1.63605e-09
199.7	1.64063e-09
199.8	1.63513e-09
199.9	1.66077e-09
[truncated: 4,001 more rows]

## Sheet: Sheet3
0	8.20923e-10
0.1	6.14777e-10
0.2	8.33282e-10
0.3	7.31964e-10
0.4	7.41425e-10				Fig4B
0.5	6.96411e-10
0.6	7.15485e-10
0.7	7.13501e-10
0.8	7.38525e-10
0.9	7.16095e-10
1	6.90155e-10
1.1	7.6889e-10
1.2	6.57959e-10
1.3	7.30743e-10
1.4	7.03583e-10
1.5	7.11975e-10
1.6	7.13196e-10
1.7	6.98242e-10
1.8	6.987e-10
1.9	6.96716e-10
2	7.20825e-10
2.1	7.17621e-10
2.2	7.37305e-10
2.3	7.47528e-10
2.4	7.35626e-10
2.5	7.40662e-10
2.6	7.61719e-10
2.7	7.21893e-10
2.8	7.60498e-10
2.9	7.57904e-10
3	7.5531e-10
3.1	7.04803e-10
3.2	6.87103e-10
3.3	7.41882e-10
3.4	6.28967e-10
3.5	7.10449e-10
3.6	7.52258e-10
3.7	6.61163e-10
3.8	7.43713e-10
3.9	7.23877e-10
4	7.25861e-10
4.1	7.06329e-10
4.2	7.05566e-10
4.3	7.15485e-10
4.4	6.85425e-10
4.5	7.25861e-10
4.6	6.8924e-10
4.7	7.21436e-10
4.8	7.34558e-10
4.9	7.22198e-10
5	7.42645e-10
5.1	7.25403e-10
5.2	7.33032e-10
5.3	6.86188e-10
5.4	6.97784e-10
5.5	7.5943e-10
5.6	7.2113e-10
5.7	6.69861e-10
5.8	7.20825e-10
5.9	6.98547e-10
6	6.93359e-10
6.1	7.51495e-10
6.2	7.33643e-10
6.3	7.70874e-10
6.4	6.75354e-10
6.5	7.52258e-10
6.6	6.3736e-10
6.7	7.18994e-10
6.8	7.22504e-10
6.9	6.71082e-10
7	7.38525e-10
7.1	7.35168e-10
7.2	7.03583e-10
7.3	6.81458e-10
7.4	7.16705e-10
7.5	6.89087e-10
7.6	6.87408e-10
7.7	7.24182e-10
7.8	6.92139e-10
7.9	7.07855e-10
8	7.37152e-10
8.1	6.633e-10
8.2	7.40204e-10
8.3	7.34711e-10
8.4	7.40967e-10
8.5	7.14264e-10
8.6	7.2998e-10
8.7	7.72247e-10
8.8	7.27081e-10
8.9	7.12891e-10
9	7.83386e-10
9.1	6.58264e-10
9.2	7.53937e-10
9.3	6.94275e-10
9.4	7.86591e-10
9.5	7.70264e-10
9.6	6.75964e-10
9.7	7.51953e-10
9.8	6.63147e-10
9.9	7.06787e-10
10	7.06482e-10
10.1	7.66602e-10
10.2	6.89697e-10
10.3	7.60956e-10
10.4	7.22961e-10
10.5	7.33795e-10
10.6	6.18744e-10
10.7	6.97021e-10
10.8	7.04956e-10
10.9	6.92444e-10
11	7.80792e-10
11.1	6.83289e-10
11.2	7.66754e-10
11.3	6.95038e-10
11.4	7.14111e-10
11.5	7.51495e-10
11.6	7.21588e-10
11.7	6.88934e-10
11.8	6.94733e-10
11.9	6.97021e-10
12	7.18231e-10
12.1	7.17468e-10
12.2	8.29468e-10
12.3	7.13196e-10
12.4	7.38373e-10
12.5	6.65436e-10
12.6	7.97577e-10
12.7	6.84204e-10
12.8	7.31812e-10
12.9	6.63605e-10
13	7.18689e-10
13.1	6.987e-10
13.2	7.27692e-10
13.3	7.46918e-10
13.4	7.00836e-10
13.5	7.27386e-10
13.6	7.46155e-10
13.7	6.78253e-10
13.8	7.17773e-10
13.9	7.53632e-10
14	6.90155e-10
14.1	6.80237e-10
14.2	6.76575e-10
14.3	7.70416e-10
14.4	7.17468e-10
14.5	7.60956e-10
14.6	7.72705e-10
14.7	6.71692e-10
14.8	7.32727e-10
14.9	7.51801e-10
15	6.75659e-10
15.1	7.00378e-10
15.2	7.17163e-10
15.3	7.32727e-10
15.4	6.81458e-10
15.5	7.19299e-10
15.6	6.73676e-10
15.7	7.12433e-10
15.8	7.20215e-10
15.9	7.51953e-10
16	6.70624e-10
16.1	7.53479e-10
16.2	6.82373e-10
16.3	7.39288e-10
16.4	7.54242e-10
16.5	7.40509e-10
16.6	6.97479e-10
16.7	6.70166e-10
16.8	7.51343e-10
16.9	6.93359e-10
17	7.31964e-10
17.1	7.26166e-10
17.2	7.5592e-10
17.3	6.97327e-10
17.4	7.21741e-10
17.5	6.6803e-10
17.6	7.05566e-10
17.7	7.6828e-10
17.8	6.60706e-10
17.9	6.9809e-10
18	7.08008e-10
18.1	6.4621e-10
18.2	7.35016e-10
18.3	7.05872e-10
18.4	6.48193e-10
18.5	7.52716e-10
18.6	6.80695e-10
18.7	7.05566e-10
18.8	7.1579e-10
18.9	6.97937e-10
19	7.50885e-10
19.1	6.94122e-10
19.2	6.91528e-10
19.3	7.29065e-10
19.4	7.09686e-10
19.5	7.54395e-10
19.6	7.21283e-10
19.7	7.62482e-10
19.8	7.19299e-10
19.9	6.79932e-10
20	7.38678e-10
20.1	7.901e-10
20.2	7.27386e-10
20.3	6.48651e-10
20.4	7.55157e-10
20.5	7.05566e-10
20.6	6.95496e-10
20.7	7.13654e-10
20.8	7.16858e-10
20.9	6.99921e-10
21	7.27234e-10
21.1	7.16705e-10
21.2	6.88324e-10
21.3	7.05872e-10
21.4	7.06635e-10
21.5	7.12585e-10
21.6	7.19452e-10
21.7	6.5033e-10
21.8	7.60345e-10
21.9	6.49109e-10
22	7.46155e-10
22.1	6.87408e-10
22.2	7.34406e-10
22.3	6.84967e-10
22.4	7.09381e-10
22.5	7.164e-10
22.6	7.73621e-10
22.7	8.14819e-10
22.8	7.04041e-10
22.9	7.16248e-10
23	7.64465e-10
23.1	5.8075e-10
23.2	7.66144e-10
23.3	7.57294e-10
23.4	7.01447e-10
23.5	6.67725e-10
23.6	6.79932e-10
23.7	7.8125e-10
23.8	6.52618e-10
23.9	7.164e-10
24	7.01447e-10
24.1	7.21283e-10
24.2	7.33032e-10
24.3	6.90002e-10
24.4	7.13043e-10
24.5	8.00934e-10
24.6	6.28357e-10
24.7	6.99005e-10
24.8	7.49817e-10
24.9	6.55823e-10
25	6.6925e-10
25.1	7.04193e-10
25.2	6.72302e-10
25.3	7.15942e-10
25.4	6.91071e-10
25.5	6.90918e-10
25.6	6.90613e-10
25.7	6.90002e-10
25.8	7.1167e-10
25.9	6.82526e-10
26	6.86951e-10
26.1	7.35321e-10
26.2	7.0343e-10
26.3	7.1167e-10
26.4	6.87561e-10
26.5	7.69806e-10
26.6	7.44629e-10
26.7	6.5506e-10
26.8	7.547e-10
26.9	7.35168e-10
27	6.69708e-10
27.1	6.89087e-10
27.2	7.73468e-10
27.3	6.79932e-10
27.4	7.00836e-10
27.5	7.7301e-10
27.6	6.92291e-10
27.7	7.164e-10
27.8	7.17621e-10
27.9	7.48291e-10
28	7.36389e-10
28.1	6.77643e-10
28.2	7.39136e-10
28.3	6.81152e-10
28.4	7.5943e-10
28.5	6.91986e-10
28.6	6.80237e-10
28.7	7.43866e-10
28.8	7.6767e-10
28.9	6.57654e-10
29	7.68585e-10
29.1	6.78864e-10
29.2	7.30133e-10
29.3	7.21893e-10
29.4	7.18689e-10
29.5	7.4585e-10
29.6	6.90308e-10
29.7	6.90765e-10
29.8	7.56531e-10
29.9	6.44073e-10
30	7.1167e-10
30.1	7.5592e-10
30.2	7.33185e-10
30.3	6.80542e-10
30.4	7.12433e-10
30.5	6.3858e-10
30.6	7.10144e-10
30.7	6.81e-10
30.8	6.83899e-10
30.9	7.95288e-10
31	7.38068e-10
31.1	7.2403e-10
31.2	7.73163e-10
31.3	6.72913e-10
31.4	7.14874e-10
31.5	7.36542e-10
31.6	7.22961e-10
31.7	6.46667e-10
31.8	7.28455e-10
31.9	7.26624e-10
32	6.61926e-10
32.1	6.74286e-10
32.2	7.40356e-10
32.3	6.86798e-10
32.4	6.62537e-10
32.5	6.58417e-10
32.6	6.46057e-10
32.7	6.75812e-10
32.8	6.85577e-10
32.9	8.1665e-10
33	6.97937e-10
33.1	7.36389e-10
33.2	7.02667e-10
33.3	7.01752e-10
33.4	7.13959e-10
33.5	7.46155e-10
33.6	6.59485e-10
33.7	6.96411e-10
33.8	7.4173e-10
33.9	6.91376e-10
34	6.84357e-10
34.1	7.1106e-10
34.2	7.18689e-10
34.3	6.85272e-10
34.4	7.18842e-10
34.5	6.96564e-10
34.6	7.3761e-10
34.7	6.77948e-10
34.8	7.12585e-10
34.9	6.92291e-10
35	7.33337e-10
35.1	6.57654e-10
35.2	6.40411e-10
35.3	7.26471e-10
35.4	6.49414e-10
35.5	6.88171e-10
35.6	7.5592e-10
35.7	6.60095e-10
35.8	6.87561e-10
35.9	7.09686e-10
36	6.84967e-10
36.1	7.64313e-10
36.2	6.49872e-10
36.3	6.77338e-10
36.4	7.56836e-10
36.5	6.97479e-10
36.6	6.8573e-10
36.7	7.1106e-10
36.8	7.4646e-10
36.9	7.15942e-10
37	7.25708e-10
37.1	7.37915e-10
37.2	7.34253e-10
37.3	6.8985e-10
37.4	6.83899e-10
37.5	7.66296e-10
37.6	7.16553e-10
37.7	6.9519e-10
37.8	6.59637e-10
37.9	7.40662e-10
38	7.31964e-10
38.1	7.37915e-10
38.2	7.43256e-10
38.3	7.26166e-10
38.4	7.22046e-10
38.5	7.30591e-10
38.6	7.37762e-10
38.7	7.44934e-10
38.8	6.41022e-10
38.9	7.49054e-10
39	6.99615e-10
39.1	7.97729e-10
39.2	6.633e-10
39.3	7.05414e-10
39.4	6.85272e-10
39.5	7.06482e-10
39.6	6.61926e-10
39.7	7.07397e-10
39.8	7.22961e-10
39.9	7.64313e-10
40	7.12891e-10
40.1	6.91986e-10
40.2	7.18384e-10
40.3	7.01599e-10
40.4	7.21283e-10
40.5	7.3822e-10
40.6	7.05109e-10
40.7	6.83899e-10
40.8	6.84204e-10
40.9	7.32727e-10
41	6.92139e-10
41.1	7.20215e-10
41.2	6.71082e-10
41.3	6.75201e-10
41.4	7.20215e-10
41.5	7.1579e-10
41.6	6.83136e-10
41.7	7.43408e-10
41.8	7.21588e-10
41.9	7.27539e-10
42	6.82373e-10
42.1	7.30286e-10
42.2	6.68945e-10
42.3	7.10144e-10
42.4	7.44171e-10
42.5	7.02515e-10
42.6	6.98395e-10
42.7	7.11212e-10
42.8	7.05719e-10
42.9	7.59583e-10
43	6.85272e-10
43.1	6.95953e-10
43.2	7.43561e-10
43.3	7.36389e-10
43.4	6.24237e-10
43.5	6.86951e-10
43.6	7.23419e-10
43.7	6.84357e-10
43.8	6.45294e-10
43.9	7.38678e-10
44	6.48651e-10
44.1	6.85883e-10
44.2	7.49664e-10
44.3	6.92749e-10
44.4	7.51343e-10
44.5	6.9046e-10
44.6	7.27539e-10
44.7	7.00684e-10
44.8	7.6828e-10
44.9	6.93359e-10
45	7.02362e-10
45.1	7.14417e-10
45.2	7.03735e-10
45.3	6.51703e-10
45.4	6.84967e-10
45.5	6.73981e-10
45.6	6.90002e-10
45.7	6.90613e-10
45.8	6.93054e-10
45.9	7.09839e-10
46	6.5918e-10
46.1	7.52563e-10
46.2	6.73828e-10
46.3	6.94122e-10
46.4	7.29523e-10
46.5	6.9809e-10
46.6	7.12433e-10
46.7	6.82373e-10
46.8	6.59027e-10
46.9	7.23419e-10
47	6.96106e-10
47.1	6.56891e-10
47.2	7.12585e-10
47.3	6.51703e-10
47.4	7.16248e-10
47.5	7.36084e-10
47.6	7.01599e-10
47.7	6.90002e-10
47.8	7.31659e-10
47.9	7.38373e-10
48	7.26624e-10
48.1	7.1579e-10
48.2	6.45752e-10
48.3	7.62024e-10
48.4	6.37207e-10
48.5	6.92749e-10
48.6	7.18536e-10
48.7	7.42493e-10
48.8	6.93054e-10
48.9	7.12585e-10
49	6.64673e-10
49.1	7.72247e-10
49.2	6.71234e-10
49.3	6.88629e-10
49.4	6.71387e-10
49.5	7.5119e-10
49.6	7.2403e-10
49.7	7.07855e-10
49.8	7.23572e-10
49.9	6.84357e-10
50	7.15942e-10
50.1	6.88477e-10
50.2	7.47223e-10
50.3	7.28912e-10
50.4	6.95343e-10
50.5	6.86951e-10
50.6	7.12891e-10
50.7	6.74438e-10
50.8	7.09076e-10
50.9	7.54242e-10
51	6.73676e-10
51.1	7.6355e-10
51.2	7.20978e-10
51.3	7.15942e-10
51.4	6.8573e-10
51.5	6.57654e-10
51.6	7.37305e-10
51.7	6.90002e-10
51.8	6.84509e-10
51.9	7.03888e-10
52	7.33795e-10
52.1	6.92139e-10
52.2	7.08923e-10
52.3	6.61469e-10
52.4	6.80542e-10
52.5	7.4295e-10
52.6	6.24084e-10
52.7	7.4585e-10
52.8	6.47583e-10
52.9	6.77948e-10
53	6.74438e-10
53.1	7.34253e-10
53.2	6.9458e-10
53.3	7.18384e-10
53.4	6.66656e-10
53.5	7.19757e-10
53.6	6.70319e-10
53.7	6.92749e-10
53.8	6.9397e-10
53.9	6.95648e-10
54	6.77185e-10
54.1	7.26471e-10
54.2	7.17926e-10
54.3	6.83136e-10
54.4	7.13196e-10
54.5	6.30341e-10
54.6	7.49359e-10
54.7	7.32117e-10
54.8	6.63757e-10
54.9	7.40814e-10
55	7.82471e-10
55.1	6.81e-10
55.2	6.8512e-10
55.3	6.96259e-10
55.4	7.32422e-10
55.5	7.38983e-10
55.6	6.65436e-10
55.7	7.43866e-10
55.8	6.61774e-10
55.9	7.2998e-10
56	7.68738e-10
56.1	6.52466e-10
56.2	6.9809e-10
56.3	7.29065e-10
56.4	7.49969e-10
56.5	6.37665e-10
56.6	7.06177e-10
56.7	6.65131e-10
56.8	6.88477e-10
56.9	7.17468e-10
57	7.33032e-10
57.1	7.21893e-10
57.2	6.70776e-10
57.3	7.75146e-10
57.4	7.20062e-10
57.5	7.37915e-10
57.6	7.09229e-10
57.7	7.33948e-10
57.8	7.18689e-10
57.9	6.77643e-10
58	6.40411e-10
58.1	7.72095e-10
58.2	6.90308e-10
58.3	6.75201e-10
58.4	7.02667e-10
58.5	6.90613e-10
58.6	7.35626e-10
58.7	7.07092e-10
58.8	6.82373e-10
58.9	7.29675e-10
59	6.49414e-10
59.1	6.80389e-10
59.2	7.09381e-10
59.3	6.90308e-10
59.4	6.99615e-10
59.5	6.56281e-10
59.6	7.3288e-10
59.7	7.53326e-10
59.8	6.95801e-10
59.9	6.91681e-10
60	6.72455e-10
60.1	6.85425e-10
60.2	7.18079e-10
60.3	6.82373e-10
60.4	6.97632e-10
60.5	7.57751e-10
60.6	7.32422e-10
60.7	6.56738e-10
60.8	6.72913e-10
60.9	6.92596e-10
61	6.41479e-10
61.1	7.07703e-10
61.2	7.06024e-10
61.3	7.25555e-10
61.4	6.45142e-10
61.5	6.93207e-10
61.6	6.69098e-10
61.7	6.91071e-10
61.8	6.90155e-10
61.9	7.59888e-10
62	7.06329e-10
62.1	7.16095e-10
62.2	6.48193e-10
62.3	7.05109e-10
62.4	6.78406e-10
62.5	7.35321e-10
62.6	7.30743e-10
62.7	7.46307e-10
62.8	6.52618e-10
62.9	7.77435e-10
63	7.35626e-10
63.1	7.22046e-10
63.2	7.00378e-10
63.3	7.61414e-10
63.4	7.13348e-10
63.5	7.12891e-10
63.6	6.60248e-10
63.7	6.59027e-10
63.8	6.92139e-10
63.9	7.31506e-10
64	6.50482e-10
64.1	7.08466e-10
64.2	6.41327e-10
64.3	6.26984e-10
64.4	6.91986e-10
64.5	7.3822e-10
64.6	7.16248e-10
64.7	7.2113e-10
64.8	6.98242e-10
64.9	7.33643e-10
65	6.92291e-10
65.1	7.03278e-10
65.2	6.9931e-10
65.3	7.40356e-10
65.4	7.03125e-10
65.5	6.73523e-10
65.6	6.56281e-10
65.7	7.35931e-10
65.8	7.40814e-10
65.9	7.17621e-10
66	6.81152e-10
66.1	6.55975e-10
66.2	7.14569e-10
66.3	6.66962e-10
66.4	6.82373e-10
66.5	7.12891e-10
66.6	6.5033e-10
66.7	7.15637e-10
66.8	6.9046e-10
66.9	7.28149e-10
67	6.36749e-10
67.1	7.23419e-10
67.2	8.00629e-10
67.3	7.01904e-10
67.4	7.50427e-10
67.5	6.53076e-10
67.6	7.38831e-10
67.7	6.9809e-10
67.8	6.89545e-10
67.9	6.5506e-10
68	7.21741e-10
68.1	7.48596e-10
68.2	7.47986e-10
68.3	6.68488e-10
68.4	7.00226e-10
68.5	7.40967e-10
68.6	6.9458e-10
68.7	7.01141e-10
68.8	7.27844e-10
68.9	6.8573e-10
69	7.25555e-10
69.1	7.03278e-10
69.2	6.88629e-10
69.3	7.53174e-10
69.4	6.91528e-10
69.5	7.08618e-10
69.6	7.26318e-10
69.7	7.26013e-10
69.8	7.30286e-10
69.9	7.12128e-10
70	6.88782e-10
70.1	7.36389e-10
70.2	7.2052e-10
70.3	7.36847e-10
70.4	7.08618e-10
70.5	6.7688e-10
70.6	7.23877e-10
70.7	7.52716e-10
70.8	6.9519e-10
70.9	7.34558e-10
71	7.75146e-10
71.1	7.06787e-10
71.2	7.16705e-10
71.3	6.98395e-10
71.4	6.98547e-10
71.5	7.24487e-10
71.6	7.69348e-10
71.7	6.77643e-10
71.8	7.35626e-10
71.9	6.87103e-10
72	7.29675e-10
72.1	7.26318e-10
72.2	7.35779e-10
72.3	7.40051e-10
72.4	6.44684e-10
72.5	6.7337e-10
72.6	6.93817e-10
72.7	7.49969e-10
72.8	6.89545e-10
72.9	6.87256e-10
73	7.35931e-10
73.1	7.35626e-10
73.2	7.10144e-10
73.3	6.86188e-10
73.4	6.65283e-10
73.5	7.33643e-10
73.6	6.79169e-10
73.7	6.38885e-10
73.8	7.4646e-10
73.9	6.76422e-10
74	7.02972e-10
74.1	6.86646e-10
74.2	7.75146e-10
74.3	7.11823e-10
74.4	6.97784e-10
74.5	6.52771e-10
74.6	7.11365e-10
74.7	6.33545e-10
74.8	7.27234e-10
74.9	6.91986e-10
75	7.2113e-10
75.1	7.08466e-10
75.2	7.35016e-10
75.3	6.91681e-10
75.4	7.02057e-10
75.5	6.5094e-10
75.6	7.0343e-10
75.7	6.68182e-10
75.8	6.85883e-10
75.9	6.77338e-10
76	6.99158e-10
76.1	6.95801e-10
76.2	7.31354e-10
76.3	7.12891e-10
76.4	6.87103e-10
76.5	7.18079e-10
76.6	6.5567e-10
76.7	6.91528e-10
76.8	6.93665e-10
76.9	6.86188e-10
77	7.26624e-10
77.1	6.81458e-10
77.2	6.9519e-10
77.3	7.29828e-10
77.4	7.16705e-10
77.5	6.68182e-10
77.6	7.70264e-10
77.7	6.49872e-10
77.8	7.16095e-10
77.9	6.85272e-10
78	7.5058e-10
78.1	7.18384e-10
78.2	6.99463e-10
78.3	6.87714e-10
78.4	7.03888e-10
78.5	6.87256e-10
78.6	7.07092e-10
78.7	6.99005e-10
78.8	7.83997e-10
78.9	6.87866e-10
79	6.97632e-10
79.1	6.7215e-10
79.2	7.5592e-10
79.3	6.74744e-10
79.4	6.98395e-10
79.5	7.30591e-10
79.6	6.79779e-10
79.7	7.43713e-10
79.8	6.90613e-10
79.9	7.22809e-10
80	7.07397e-10
80.1	7.40662e-10
80.2	7.17316e-10
80.3	6.0257e-10
80.4	6.97479e-10
80.5	7.09381e-10
80.6	6.71997e-10
80.7	6.74438e-10
80.8	6.97632e-10
80.9	7.68433e-10
81	7.17316e-10
81.1	6.81915e-10
81.2	7.43408e-10
81.3	7.06635e-10
81.4	6.62231e-10
81.5	6.58722e-10
81.6	6.38733e-10
81.7	7.25861e-10
81.8	6.71692e-10
81.9	7.50885e-10
82	7.41425e-10
82.1	6.98853e-10
82.2	6.72913e-10
82.3	7.18842e-10
82.4	7.44476e-10
82.5	7.23267e-10
82.6	6.0257e-10
82.7	7.42645e-10
82.8	6.60858e-10
82.9	7.65686e-10
83	6.8985e-10
83.1	6.71997e-10
83.2	7.89948e-10
83.3	6.66046e-10
83.4	7.40662e-10
83.5	6.43311e-10
83.6	7.02209e-10
83.7	6.73065e-10
83.8	7.10754e-10
83.9	6.44531e-10
84	7.06329e-10
84.1	6.98547e-10
84.2	7.02057e-10
84.3	7.17163e-10
84.4	7.66449e-10
84.5	7.2113e-10
84.6	7.19604e-10
84.7	7.01599e-10
84.8	7.14874e-10
84.9	6.84662e-10
85	7.09991e-10
85.1	7.1579e-10
85.2	6.99005e-10
85.3	7.01141e-10
85.4	6.633e-10
85.5	7.19299e-10
85.6	7.04041e-10
85.7	6.88019e-10
85.8	7.4173e-10
85.9	6.3858e-10
86	6.65588e-10
86.1	6.95801e-10
86.2	6.54602e-10
86.3	7.17773e-10
86.4	7.15332e-10
86.5	6.25763e-10
86.6	6.73523e-10
86.7	6.8512e-10
86.8	7.65381e-10
86.9	6.75812e-10
87	6.97021e-10
87.1	7.06024e-10
87.2	6.08521e-10
87.3	7.53479e-10
87.4	6.73828e-10
87.5	7.0694e-10
87.6	6.6452e-10
87.7	7.12128e-10
87.8	6.88019e-10
87.9	6.427e-10
88	7.57599e-10
88.1	6.47888e-10
88.2	7.04041e-10
88.3	6.53381e-10
88.4	6.24695e-10
88.5	7.0694e-10
88.6	6.98395e-10
88.7	6.26221e-10
88.8	6.71997e-10
88.9	6.4682e-10
89	7.00989e-10
89.1	7.13959e-10
89.2	6.68793e-10
89.3	7.22351e-10
89.4	7.62634e-10
89.5	6.77795e-10
89.6	7.56378e-10
89.7	7.24792e-10
89.8	7.44934e-10
89.9	7.02209e-10
90	7.41425e-10
90.1	7.12585e-10
90.2	7.01294e-10
90.3	7.24792e-10
90.4	6.76117e-10
90.5	6.99005e-10
90.6	6.45905e-10
90.7	6.59332e-10
90.8	6.62231e-10
90.9	7.40662e-10
91	7.16858e-10
91.1	7.17163e-10
91.2	7.63245e-10
91.3	6.25153e-10
91.4	7.46002e-10
91.5	6.97784e-10
91.6	6.39648e-10
91.7	6.97479e-10
91.8	6.427e-10
91.9	7.4707e-10
92	6.87714e-10
92.1	7.92236e-10
92.2	6.50177e-10
92.3	7.31964e-10
92.4	6.98242e-10
92.5	6.97327e-10
92.6	6.9931e-10
92.7	6.83594e-10
92.8	7.04651e-10
92.9	7.23114e-10
93	6.68182e-10
93.1	6.88324e-10
93.2	6.97479e-10
93.3	6.68793e-10
93.4	7.01752e-10
93.5	7.38831e-10
93.6	6.14471e-10
93.7	7.36847e-10
93.8	6.69098e-10
93.9	7.22504e-10
94	7.20978e-10
94.1	7.52563e-10
94.2	6.72455e-10
94.3	7.2403e-10
94.4	6.24695e-10
94.5	6.80695e-10
94.6	7.23114e-10
94.7	7.51038e-10
94.8	6.73523e-10
94.9	6.98547e-10
95	5.88074e-10
95.1	7.00073e-10
95.2	7.10907e-10
95.3	6.57959e-10
95.4	6.91071e-10
95.5	7.15485e-10
95.6	6.93817e-10
95.7	7.09076e-10
95.8	6.80084e-10
95.9	7.49207e-10
96	6.46973e-10
96.1	7.26013e-10
96.2	6.69098e-10
96.3	6.47278e-10
96.4	6.64063e-10
96.5	7.00684e-10
96.6	6.87561e-10
96.7	6.82678e-10
96.8	7.38525e-10
96.9	6.62231e-10
97	7.43866e-10
97.1	7.46002e-10
97.2	7.15027e-10
97.3	7.20673e-10
97.4	7.15637e-10
97.5	6.46057e-10
97.6	6.84814e-10
97.7	6.57043e-10
97.8	6.98395e-10
97.9	7.38831e-10
98	7.25861e-10
98.1	7.64771e-10
98.2	7.34863e-10
98.3	6.55212e-10
98.4	6.78101e-10
98.5	6.87561e-10
98.6	6.47888e-10
98.7	6.65131e-10
98.8	7.14722e-10
98.9	6.01959e-10
99	6.75201e-10
99.1	6.77948e-10
99.2	7.01599e-10
99.3	7.17926e-10
99.4	6.45142e-10
99.5	6.56891e-10
99.6	6.57806e-10
99.7	7.01904e-10
99.8	6.7749e-10
99.9	6.21796e-10
100	6.54755e-10
100.1	7.07245e-10
100.2	6.51855e-10
100.3	5.86395e-10
100.4	7.15027e-10
100.5	6.71997e-10
100.6	6.66199e-10
100.7	7.19452e-10
100.8	7.35474e-10
100.9	6.58569e-10
101	7.34863e-10
101.1	6.25763e-10
101.2	6.75964e-10
101.3	7.19757e-10
101.4	6.81763e-10
101.5	6.65436e-10
101.6	6.96259e-10
101.7	7.22809e-10
101.8	5.96771e-10
101.9	7.2937e-10
102	6.53229e-10
102.1	7.18079e-10
102.2	6.97632e-10
102.3	7.19452e-10
102.4	6.91833e-10
102.5	6.73218e-10
102.6	6.69556e-10
102.7	7.47375e-10
102.8	7.09686e-10
102.9	7.01599e-10
103	6.77795e-10
103.1	6.8573e-10
103.2	6.88324e-10
103.3	7.11975e-10
103.4	7.46918e-10
103.5	6.55212e-10
103.6	7.08008e-10
103.7	6.32935e-10
103.8	7.4707e-10
103.9	7.39136e-10
104	6.31561e-10
104.1	7.06635e-10
104.2	6.61469e-10
104.3	7.1106e-10
104.4	6.8161e-10
104.5	7.18384e-10
104.6	6.64978e-10
104.7	7.4707e-10
104.8	7.80182e-10
104.9	5.93567e-10
105	7.49512e-10
105.1	6.69861e-10
105.2	7.58057e-10
105.3	7.06635e-10
105.4	6.59332e-10
105.5	6.38428e-10
105.6	6.61469e-10
105.7	7.39899e-10
105.8	6.85425e-10
105.9	6.2561e-10
106	6.55823e-10
106.1	6.98242e-10
106.2	6.39648e-10
106.3	6.57043e-10
106.4	7.40356e-10
106.5	5.97382e-10
106.6	6.94885e-10
106.7	6.79932e-10
106.8	6.65283e-10
106.9	7.03735e-10
107	7.16705e-10
107.1	6.58569e-10
107.2	6.7337e-10
107.3	6.93359e-10
107.4	6.87103e-10
107.5	7.09229e-10
107.6	6.61011e-10
107.7	6.98395e-10
107.8	7.08618e-10
107.9	7.65991e-10
108	6.64978e-10
108.1	7.41577e-10
108.2	6.68335e-10
108.3	6.34155e-10
108.4	6.95496e-10
108.5	7.30591e-10
108.6	6.7627e-10
108.7	6.85577e-10
108.8	7.06177e-10
108.9	7.00531e-10
109	6.92139e-10
109.1	7.57294e-10
109.2	7.2876e-10
109.3	6.46057e-10
109.4	7.5943e-10
109.5	6.53381e-10
109.6	7.41577e-10
109.7	7.43408e-10
109.8	6.91681e-10
109.9	6.8985e-10
110	6.91376e-10
110.1	6.33698e-10
110.2	6.40717e-10
110.3	7.2052e-10
110.4	6.8161e-10
110.5	7.50122e-10
110.6	6.75201e-10
110.7	6.87103e-10
110.8	6.84357e-10
110.9	7.11212e-10
111	6.65588e-10
111.1	7.04956e-10
111.2	7.07092e-10
111.3	7.00226e-10
111.4	6.41174e-10
111.5	7.10602e-10
111.6	7.2998e-10
111.7	6.93817e-10
111.8	7.05261e-10
111.9	6.95801e-10
112	6.53992e-10
112.1	7.14722e-10
112.2	7.00226e-10
112.3	6.89697e-10
112.4	7.17316e-10
112.5	7.01294e-10
112.6	7.48444e-10
112.7	6.89087e-10
112.8	6.87103e-10
112.9	6.20422e-10
113	7.22809e-10
113.1	6.97784e-10
113.2	6.96259e-10
113.3	7.08008e-10
113.4	6.55823e-10
113.5	6.71997e-10
113.6	6.86798e-10
113.7	6.95343e-10
113.8	6.99615e-10
113.9	6.39648e-10
114	6.81305e-10
114.1	7.54242e-10
114.2	7.12738e-10
114.3	6.70776e-10
114.4	7.16858e-10
114.5	6.56433e-10
114.6	7.05261e-10
114.7	7.13501e-10
114.8	6.55518e-10
114.9	6.88171e-10
115	6.92902e-10
115.1	7.06329e-10
115.2	6.8222e-10
115.3	6.78253e-10
115.4	7.09991e-10
115.5	7.69958e-10
115.6	7.02057e-10
115.7	7.22198e-10
115.8	6.33545e-10
115.9	6.54297e-10
116	7.61261e-10
116.1	6.70624e-10
116.2	7.6889e-10
116.3	6.75201e-10
116.4	6.65283e-10
116.5	7.58667e-10
116.6	6.59332e-10
116.7	6.66199e-10
116.8	7.25861e-10
116.9	7.06329e-10
117	7.02362e-10
117.1	7.68433e-10
117.2	6.28662e-10
117.3	7.67212e-10
117.4	6.93359e-10
117.5	7.22504e-10
117.6	6.35529e-10
117.7	7.54547e-10
117.8	6.87561e-10
117.9	7.03735e-10
118	6.09589e-10
118.1	6.70471e-10
118.2	6.60095e-10
118.3	7.28302e-10
118.4	6.28967e-10
118.5	7.23724e-10
118.6	6.45905e-10
118.7	7.16858e-10
118.8	6.77948e-10
118.9	7.10144e-10
119	6.91528e-10
119.1	6.94733e-10
119.2	6.6925e-10
119.3	7.08313e-10
119.4	7.08771e-10
119.5	7.16095e-10
119.6	6.48651e-10
119.7	7.10754e-10
119.8	6.57501e-10
119.9	6.74744e-10
120	6.65436e-10
120.1	7.13348e-10
120.2	6.34613e-10
120.3	6.94122e-10
120.4	7.41119e-10
120.5	6.6803e-10
120.6	6.95496e-10
120.7	7.2876e-10
120.8	6.90918e-10
120.9	7.37305e-10
121	6.88477e-10
121.1	7.19604e-10
121.2	7.10754e-10
121.3	7.4707e-10
121.4	6.48804e-10
121.5	6.55365e-10
121.6	6.65131e-10
121.7	6.70013e-10
121.8	6.93512e-10
121.9	6.72302e-10
122	6.75659e-10
122.1	6.60706e-10
122.2	7.23877e-10
122.3	6.62384e-10
122.4	6.60858e-10
122.5	7.1167e-10
122.6	6.52008e-10
122.7	7.55005e-10
122.8	6.82526e-10
122.9	6.96411e-10
123	7.06482e-10
123.1	6.99768e-10
123.2	6.73676e-10
123.3	7.09229e-10
123.4	6.78711e-10
123.5	7.31812e-10
123.6	6.34003e-10
123.7	7.43408e-10
123.8	6.06842e-10
123.9	6.95801e-10
124	6.57196e-10
124.1	6.89392e-10
124.2	6.57654e-10
124.3	7.164e-10
124.4	6.62689e-10
124.5	7.60803e-10
124.6	6.4209e-10
124.7	6.75354e-10
124.8	7.49359e-10
124.9	7.15485e-10
125	6.45294e-10
125.1	6.78864e-10
125.2	6.29578e-10
125.3	7.29675e-10
125.4	6.54144e-10
125.5	7.27539e-10
125.6	6.60248e-10
125.7	6.85883e-10
125.8	7.25708e-10
125.9	6.72607e-10
126	6.52466e-10
126.1	7.1106e-10
126.2	6.28967e-10
126.3	7.164e-10
126.4	6.61926e-10
126.5	6.82831e-10
126.6	6.93054e-10
126.7	7.28912e-10
126.8	6.61011e-10
126.9	6.85577e-10
127	6.22711e-10
127.1	6.7337e-10
127.2	6.62994e-10
127.3	7.6355e-10
127.4	6.57654e-10
127.5	7.43256e-10
127.6	6.47278e-10
127.7	7.8064e-10
127.8	6.7337e-10
127.9	6.85577e-10
128	6.50177e-10
128.1	7.2998e-10
128.2	6.49872e-10
128.3	6.633e-10
128.4	6.98547e-10
128.5	6.90918e-10
128.6	6.77643e-10
128.7	7.27692e-10
128.8	6.58722e-10
128.9	7.01599e-10
129	6.96716e-10
129.1	6.87714e-10
129.2	6.5567e-10
129.3	7.04041e-10
129.4	6.50177e-10
129.5	7.1701e-10
129.6	6.76117e-10
129.7	7.38068e-10
129.8	6.62842e-10
129.9	6.32782e-10
130	7.07092e-10
130.1	6.76117e-10
130.2	6.81915e-10
130.3	7.01294e-10
130.4	7.29675e-10
130.5	6.73218e-10
130.6	6.3858e-10
130.7	7.10754e-10
130.8	6.98395e-10
130.9	6.81305e-10
131	7.62024e-10
131.1	6.87714e-10
131.2	6.95496e-10
131.3	7.04346e-10
131.4	6.80542e-10
131.5	7.13501e-10
131.6	6.36749e-10
131.7	7.15332e-10
131.8	7.33795e-10
131.9	6.31714e-10
132	7.00073e-10
132.1	7.03735e-10
132.2	6.5155e-10
132.3	7.40967e-10
132.4	6.34918e-10
132.5	7.14417e-10
132.6	6.34155e-10
132.7	6.69556e-10
132.8	6.39648e-10
132.9	6.7276e-10
133	7.17468e-10
133.1	6.34613e-10
133.2	7.01752e-10
133.3	6.59332e-10
133.4	6.37054e-10
133.5	6.48193e-10
133.6	7.09229e-10
133.7	6.92139e-10
133.8	7.15027e-10
133.9	6.56128e-10
134	7.22198e-10
134.1	7.07703e-10
134.2	6.66656e-10
134.3	7.17163e-10
134.4	6.92139e-10
134.5	7.09991e-10
134.6	7.66449e-10
134.7	7.08008e-10
134.8	6.87866e-10
134.9	6.71082e-10
135	6.62537e-10
135.1	7.1991e-10
135.2	6.62842e-10
135.3	6.62537e-10
135.4	6.99615e-10
135.5	6.50635e-10
135.6	6.83289e-10
135.7	6.66962e-10
135.8	6.44379e-10
135.9	7.23267e-10
136	6.83441e-10
136.1	7.41119e-10
136.2	5.70068e-10
136.3	7.43408e-10
136.4	6.61469e-10
136.5	7.26776e-10
136.6	6.32019e-10
136.7	7.04193e-10
136.8	5.95093e-10
136.9	6.99463e-10
137	6.54602e-10
137.1	7.59277e-10
137.2	6.44836e-10
137.3	7.48444e-10
137.4	6.6925e-10
137.5	7.05261e-10
137.6	6.94275e-10
137.7	6.79932e-10
137.8	7.26013e-10
137.9	6.70471e-10
138	6.56586e-10
138.1	6.81763e-10
138.2	7.42493e-10
138.3	6.83441e-10
138.4	6.46973e-10
138.5	6.90918e-10
138.6	7.15637e-10
138.7	6.20117e-10
138.8	6.79321e-10
138.9	7.35016e-10
139	6.7215e-10
139.1	6.65588e-10
139.2	6.7276e-10
139.3	7.07397e-10
139.4	6.64978e-10
139.5	7.39746e-10
139.6	6.52618e-10
139.7	7.00378e-10
139.8	6.44226e-10
139.9	7.14264e-10
140	7.13196e-10
140.1	6.40869e-10
140.2	6.83289e-10
140.3	6.40564e-10
140.4	6.60706e-10
140.5	6.71234e-10
140.6	6.49109e-10
140.7	7.46765e-10
140.8	6.39648e-10
140.9	7.12738e-10
141	7.5058e-10
141.1	6.73676e-10
141.2	7.01141e-10
141.3	7.27234e-10
141.4	6.69098e-10
141.5	7.64923e-10
141.6	-3.38745e-11
141.7	8.27179e-10
141.8	7.11212e-10
141.9	7.6889e-10
142	7.56378e-10
142.1	7.78046e-10
142.2	7.45239e-10
142.3	7.89185e-10
142.4	7.57446e-10
142.5	8.05817e-10
142.6	7.66907e-10
142.7	7.04193e-10
142.8	6.6864e-10
142.9	8.09174e-10
143	7.55005e-10
143.1	7.20978e-10
143.2	7.56836e-10
143.3	8.67004e-10
143.4	7.06177e-10
143.5	7.49817e-10
143.6	7.5943e-10
143.7	8.16345e-10
143.8	7.01447e-10
143.9	7.51343e-10
144	7.89185e-10
144.1	7.8537e-10
144.2	6.88629e-10
144.3	7.52716e-10
144.4	7.17926e-10
144.5	7.98492e-10
144.6	7.13654e-10
144.7	6.69861e-10
144.8	7.95288e-10
144.9	8.23669e-10
145	7.33337e-10
145.1	8.12225e-10
145.2	7.547e-10
145.3	8.39844e-10
145.4	7.57904e-10
145.5	7.82166e-10
145.6	7.17926e-10
145.7	7.70874e-10
145.8	7.8598e-10
145.9	7.13806e-10
146	7.30286e-10
146.1	7.98645e-10
146.2	7.20367e-10
146.3	7.52411e-10
146.4	8.05359e-10
146.5	8.57697e-10
146.6	6.74896e-10
146.7	7.97424e-10
146.8	7.69196e-10
146.9	7.54395e-10
147	8.09937e-10
147.1	7.44324e-10
147.2	7.67517e-10
147.3	7.57751e-10
147.4	7.83539e-10
147.5	7.38373e-10
147.6	7.23419e-10
147.7	7.33337e-10
147.8	8.0246e-10
147.9	7.57751e-10
148	7.65228e-10
148.1	7.66449e-10
148.2	7.14111e-10
148.3	8.26416e-10
148.4	7.58362e-10
148.5	7.69348e-10
148.6	7.31049e-10
148.7	7.78198e-10
148.8	7.49207e-10
148.9	7.64771e-10
149	8.00781e-10
149.1	7.72858e-10
149.2	7.20062e-10
149.3	7.22046e-10
149.4	7.22809e-10
149.5	7.69348e-10
149.6	7.46613e-10
149.7	6.93817e-10
149.8	7.68738e-10
149.9	7.87506e-10
150	7.16705e-10
150.1	7.67059e-10
150.2	7.53937e-10
150.3	7.73163e-10
150.4	6.84509e-10
150.5	7.36084e-10
150.6	7.3288e-10
150.7	7.58209e-10
150.8	7.02972e-10
150.9	7.18842e-10
151	7.341e-10
151.1	7.56073e-10
151.2	1.83441e-09
151.3	1.31638e-09
151.4	9.27124e-10
151.5	9.62677e-10
151.6	7.96661e-10
151.7	7.2052e-10
151.8	6.47736e-10
151.9	2.03552e-10
152	1.08032e-10
152.1	3.58582e-10
152.2	3.97644e-10
152.3	6.35529e-10
152.4	3.47748e-10
152.5	6.64063e-10
152.6	6.47125e-10
152.7	6.68335e-10
152.8	7.05414e-10
152.9	6.17981e-10
153	7.21436e-10
153.1	7.42798e-10
153.2	5.78613e-10
153.3	6.56586e-10
153.4	7.22046e-10
153.5	7.00226e-10
153.6	6.91986e-10
153.7	7.08618e-10
153.8	7.70874e-10
153.9	7.25861e-10
154	6.85425e-10
154.1	5.62439e-10
154.2	9.5871e-10
154.3	7.82776e-10
154.4	8.08105e-10
154.5	5.69e-10
154.6	5.50232e-10
154.7	7.7652e-10
154.8	6.97632e-10
154.9	5.98145e-10
155	6.79169e-10
155.1	7.42645e-10
155.2	6.21796e-10
155.3	6.19812e-10
155.4	7.73926e-10
155.5	7.39746e-10
155.6	4.26941e-10
155.7	7.83234e-10
155.8	7.94525e-10
155.9	5.9021e-10
156	4.93011e-10
156.1	7.39136e-10
156.2	7.86591e-10
156.3	6.04553e-10
156.4	6.39648e-10
156.5	7.4585e-10
156.6	6.9458e-10
156.7	6.99005e-10
156.8	6.15234e-10
156.9	7.82776e-10
157	6.82068e-10
157.1	7.75146e-10
157.2	7.01294e-10
157.3	8.13904e-10
157.4	6.53076e-10
157.5	6.3858e-10
157.6	7.40814e-10
157.7	7.30743e-10
157.8	8.11005e-10
157.9	6.86188e-10
158	6.16608e-10
158.1	6.23016e-10
158.2	7.01294e-10
158.3	7.61414e-10
158.4	6.55823e-10
158.5	8.00476e-10
158.6	6.7627e-10
158.7	8.60138e-10
158.8	7.40509e-10
158.9	6.91833e-10
159	7.71484e-10
159.1	7.52106e-10
159.2	6.77643e-10
159.3	8.20618e-10
159.4	7.84149e-10
159.5	8.44574e-10
159.6	7.72858e-10
159.7	6.76117e-10
159.8	7.724e-10
159.9	8.08258e-10
160	7.79419e-10
160.1	7.60803e-10
160.2	7.38525e-10
160.3	7.43256e-10
160.4	6.49567e-10
160.5	6.90613e-10
160.6	7.50732e-10
160.7	5.97382e-10
160.8	8.51135e-10
160.9	7.64618e-10
161	6.00281e-10
161.1	7.78046e-10
161.2	5.00488e-10
161.3	8.78448e-10
161.4	8.69141e-10
161.5	6.28662e-10
161.6	8.7204e-10
161.7	7.5882e-10
161.8	7.45239e-10
161.9	6.52618e-10
162	7.48901e-10
162.1	5.77545e-10
162.2	8.1665e-10
162.3	6.46667e-10
162.4	7.74078e-10
162.5	4.76685e-10
162.6	5.98907e-10
162.7	8.97827e-10
162.8	5.48553e-10
162.9	6.85272e-10
163	9.08356e-10
163.1	7.07092e-10
163.2	7.80945e-10
163.3	6.75201e-10
163.4	6.28204e-10
163.5	6.81915e-10
163.6	7.08618e-10
163.7	7.20367e-10
163.8	7.547e-10
163.9	6.92139e-10
164	6.82678e-10
164.1	7.15942e-10
164.2	8.54034e-10
164.3	7.5592e-10
164.4	6.37665e-10
164.5	7.7774e-10
164.6	7.94983e-10
164.7	7.56989e-10
164.8	7.02057e-10
164.9	7.73773e-10
165	7.87811e-10
165.1	7.03735e-10
165.2	8.03833e-10
165.3	7.78351e-10
165.4	7.12585e-10
165.5	6.50482e-10
165.6	7.04193e-10
165.7	7.11365e-10
165.8	8.11615e-10
165.9	6.88934e-10
166	6.53229e-10
166.1	6.62079e-10
166.2	6.80847e-10
166.3	7.7713e-10
166.4	7.46307e-10
166.5	7.52563e-10
166.6	6.68488e-10
166.7	7.57294e-10
166.8	8.66852e-10
166.9	7.52563e-10
167	7.50122e-10
167.1	7.18994e-10
167.2	7.35321e-10
167.3	8.22449e-10
167.4	7.9895e-10
167.5	8.03986e-10
167.6	6.9397e-10
167.7	6.95496e-10
167.8	7.28607e-10
167.9	7.83081e-10
168	7.5119e-10
168.1	6.34003e-10
168.2	7.44934e-10
168.3	7.52411e-10
168.4	7.81403e-10
168.5	6.69403e-10
168.6	6.99005e-10
168.7	7.20673e-10
168.8	8.00171e-10
168.9	6.41174e-10
169	7.20673e-10
169.1	6.92596e-10
169.2	7.23572e-10
169.3	7.64465e-10
169.4	6.97021e-10
169.5	7.60498e-10
169.6	6.90918e-10
169.7	6.83289e-10
169.8	6.67419e-10
169.9	6.94427e-10
170	7.0694e-10
170.1	8.05664e-10
170.2	6.61469e-10
170.3	6.79626e-10
170.4	7.04193e-10
170.5	7.35779e-10
170.6	7.46307e-10
170.7	6.7337e-10
170.8	6.99463e-10
170.9	7.49512e-10
171	7.27081e-10
171.1	6.73981e-10
171.2	7.06787e-10
171.3	7.40967e-10
171.4	7.8949e-10
171.5	7.08008e-10
171.6	6.74744e-10
171.7	6.95038e-10
171.8	6.90002e-10
171.9	7.69806e-10
172	7.21588e-10
172.1	7.10297e-10
172.2	7.11365e-10
172.3	7.0282e-10
172.4	7.15485e-10
172.5	7.59277e-10
172.6	7.09229e-10
172.7	6.69708e-10
172.8	6.84814e-10
172.9	7.44476e-10
173	7.79114e-10
173.1	7.22809e-10
173.2	6.5094e-10
173.3	6.65588e-10
173.4	6.64825e-10
173.5	7.32269e-10
173.6	7.27386e-10
173.7	7.72705e-10
173.8	7.07092e-10
173.9	6.85883e-10
174	6.91376e-10
174.1	7.5882e-10
174.2	7.06024e-10
174.3	7.1228e-10
174.4	6.77185e-10
174.5	7.33032e-10
174.6	6.99463e-10
174.7	7.08466e-10
174.8	6.09283e-10
174.9	6.88934e-10
175	6.57043e-10
175.1	7.97272e-10
175.2	7.59735e-10
175.3	6.50482e-10
175.4	6.78253e-10
175.5	6.81305e-10
175.6	7.42798e-10
175.7	6.79016e-10
175.8	7.84302e-10
175.9	7.33643e-10
176	6.8924e-10
176.1	7.04041e-10
176.2	7.2525e-10
176.3	7.01752e-10
176.4	7.57751e-10
176.5	7.09534e-10
176.6	6.74591e-10
176.7	6.95496e-10
176.8	7.60345e-10
176.9	6.95038e-10
177	6.59485e-10
177.1	7.10754e-10
177.2	7.43713e-10
177.3	7.50427e-10
177.4	7.48291e-10
177.5	6.89545e-10
177.6	6.9397e-10
177.7	7.09229e-10
177.8	8.00629e-10
177.9	7.55768e-10
178	6.83899e-10
178.1	6.87256e-10
178.2	7.30133e-10
178.3	7.28302e-10
178.4	8.00476e-10
178.5	6.31561e-10
178.6	7.51648e-10
178.7	6.96106e-10
178.8	7.64313e-10
178.9	7.65686e-10
179	6.9397e-10
179.1	7.00836e-10
179.2	8.1665e-10
179.3	6.81152e-10
179.4	7.13196e-10
179.5	8.28247e-10
179.6	7.18079e-10
179.7	7.24335e-10
179.8	6.61011e-10
179.9	7.08923e-10
180	8.19702e-10
180.1	7.00073e-10
180.2	6.88324e-10
180.3	7.06635e-10
180.4	7.84607e-10
180.5	7.70569e-10
180.6	7.12433e-10
180.7	7.26471e-10
180.8	6.59485e-10
180.9	7.23572e-10
181	7.76367e-10
181.1	7.26929e-10
181.2	6.93054e-10
181.3	7.49969e-10
181.4	6.85577e-10
181.5	7.53479e-10
181.6	7.85217e-10
181.7	6.8573e-10
181.8	6.66962e-10
181.9	7.3288e-10
182	7.17316e-10
182.1	7.55005e-10
182.2	6.49567e-10
182.3	7.27234e-10
182.4	7.07703e-10
182.5	7.95746e-10
182.6	7.47375e-10
182.7	6.14777e-10
182.8	7.72552e-10
182.9	7.54089e-10
183	7.38525e-10
183.1	1.02585e-09
183.2	6.7215e-10
183.3	-5.54962e-10
183.4	1.11938e-09
183.5	9.8938e-10
183.6	4.84009e-10
183.7	7.14569e-10
183.8	9.57947e-10
183.9	7.00226e-10
184	8.61359e-10
184.1	8.21381e-10
184.2	6.79626e-10
184.3	8.68073e-10
184.4	8.41064e-10
184.5	6.46667e-10
184.6	9.3338e-10
184.7	5.03998e-10
184.8	7.72247e-10
184.9	8.14056e-10
185	7.48749e-10
185.1	8.50983e-10
185.2	6.33545e-10
185.3	7.49207e-10
185.4	9.18884e-10
185.5	7.96814e-10
185.6	7.38068e-10
185.7	4.72565e-10
185.8	1.00235e-09
185.9	6.71234e-10
186	5.79834e-10
186.1	6.81915e-10
186.2	5.72357e-10
186.3	7.51495e-10
186.4	1.0672e-09
186.5	7.81555e-10
186.6	8.16193e-10
186.7	6.86035e-10
186.8	6.14319e-10
186.9	7.53784e-10
187	6.85425e-10
187.1	7.74078e-10
187.2	6.43158e-10
187.3	6.76575e-10
187.4	6.72913e-10
187.5	7.35931e-10
187.6	6.61011e-10
187.7	6.68793e-10
187.8	7.17621e-10
187.9	7.46307e-10
188	7.41119e-10
188.1	7.54395e-10
188.2	6.82983e-10
188.3	7.03125e-10
188.4	7.73468e-10
188.5	6.95038e-10
188.6	6.54297e-10
188.7	6.8161e-10
188.8	7.38831e-10
188.9	6.62384e-10
189	6.09589e-10
189.1	6.78711e-10
189.2	7.21436e-10
189.3	6.65131e-10
189.4	6.85425e-10
189.5	7.47223e-10
189.6	7.01904e-10
189.7	6.62994e-10
189.8	7.42798e-10
189.9	6.427e-10
190	6.99463e-10
190.1	6.26831e-10
190.2	7.13043e-10
190.3	6.93817e-10
190.4	6.45447e-10
190.5	6.79169e-10
190.6	6.43463e-10
190.7	7.3761e-10
190.8	7.17773e-10
190.9	7.31812e-10
191	7.34406e-10
191.1	7.99255e-10
191.2	6.89545e-10
191.3	7.64465e-10
191.4	8.21991e-10
191.5	7.94983e-10
191.6	7.06177e-10
191.7	7.49207e-10
191.8	7.73163e-10
191.9	8.47015e-10
192	7.67822e-10
192.1	7.96051e-10
192.2	7.92236e-10
192.3	8.52356e-10
192.4	7.89795e-10
192.5	8.45947e-10
192.6	8.6792e-10
192.7	8.1665e-10
192.8	8.07037e-10
192.9	8.15887e-10
193	8.71735e-10
193.1	9.1568e-10
193.2	7.88422e-10
193.3	8.59985e-10
193.4	8.89893e-10
193.5	8.79059e-10
193.6	8.88062e-10
193.7	9.3277e-10
193.8	8.22906e-10
193.9	9.76105e-10
194	8.74939e-10
194.1	9.18427e-10
194.2	9.5459e-10
194.3	9.53979e-10
194.4	9.02557e-10
194.5	9.92889e-10
194.6	9.5047e-10
194.7	1.00632e-09
194.8	9.4986e-10
194.9	8.93707e-10
195	9.86176e-10
195.1	9.88464e-10
195.2	9.4635e-10
195.3	1.00143e-09
195.4	1.01547e-09
195.5	1.06918e-09
195.6	9.50928e-10
195.7	1.0405e-09
195.8	9.87701e-10
195.9	1.08414e-09
196	1.00845e-09
196.1	9.6817e-10
196.2	1.06964e-09
196.3	1.07071e-09
196.4	1.04172e-09
196.5	1.06491e-09
196.6	1.09039e-09
196.7	1.10672e-09
196.8	1.05164e-09
196.9	1.10031e-09
197	1.12381e-09
197.1	1.17355e-09
197.2	1.11359e-09
197.3	1.09329e-09
197.4	1.14746e-09
197.5	1.18118e-09
197.6	1.035e-09
197.7	1.13693e-09
197.8	1.18515e-09
197.9	1.21841e-09
198	1.16348e-09
198.1	1.21658e-09
198.2	1.18774e-09
198.3	1.26953e-09
198.4	1.14365e-09
198.5	1.17279e-09
198.6	1.18469e-09
198.7	1.17142e-09
198.8	1.19537e-09
198.9	1.20041e-09
199	1.25e-09
199.1	1.24496e-09
199.2	1.15128e-09
199.3	1.23489e-09
199.4	1.32858e-09
199.5	1.31546e-09
199.6	1.20926e-09
199.7	1.26556e-09
199.8	1.28479e-09
199.9	1.24741e-09
[truncated: 40,007 more rows]

## Sheet: Sheet4
0	3.98254e-10
0.1	3.11279e-10
0.2	3.93372e-10
0.3	3.32794e-10				Fig6
0.4	3.6499e-10
0.5	3.40424e-10
0.6	3.16772e-10
0.7	3.78571e-10
0.8	3.80402e-10
0.9	2.9129e-10
1	3.28064e-10
1.1	3.55377e-10
1.2	3.22418e-10
1.3	3.92456e-10
1.4	3.00903e-10
1.5	3.57361e-10
1.6	3.54004e-10
1.7	3.55682e-10
1.8	4.05579e-10
1.9	4.08478e-10
2	3.67432e-10
2.1	3.2608e-10
2.2	3.30963e-10
2.3	3.24249e-10
2.4	3.66058e-10
2.5	3.92303e-10
2.6	3.64838e-10
2.7	3.26385e-10
2.8	3.7796e-10
2.9	3.46222e-10
3	3.71246e-10
3.1	3.94897e-10
3.2	3.50037e-10
3.3	3.34015e-10
3.4	3.45917e-10
3.5	3.66516e-10
3.6	3.33862e-10
3.7	3.36761e-10
3.8	3.68958e-10
3.9	3.55225e-10
4	3.06702e-10
4.1	3.14789e-10
4.2	3.43933e-10
4.3	3.53546e-10
4.4	3.00446e-10
4.5	3.75061e-10
4.6	3.1189e-10
4.7	3.40881e-10
4.8	4.07715e-10
4.9	3.08533e-10
5	3.42865e-10
5.1	2.89001e-10
5.2	3.39203e-10
5.3	3.55072e-10
5.4	3.0426e-10
5.5	3.73077e-10
5.6	3.76129e-10
5.7	3.39355e-10
5.8	3.46985e-10
5.9	3.50952e-10
6	3.43018e-10
6.1	2.93884e-10
6.2	3.33862e-10
6.3	3.61176e-10
6.4	3.55835e-10
6.5	3.46375e-10
6.6	3.93829e-10
6.7	2.94952e-10
6.8	4.1275e-10
6.9	3.16315e-10
7	3.58429e-10
7.1	3.69873e-10
7.2	4.2923e-10
7.3	3.45154e-10
7.4	3.90472e-10
7.5	3.81012e-10
7.6	3.65753e-10
7.7	3.35846e-10
7.8	3.75366e-10
7.9	3.37372e-10
8	3.77197e-10
8.1	3.56903e-10
8.2	3.20587e-10
8.3	4.03595e-10
8.4	3.69873e-10
8.5	3.36914e-10
8.6	3.86353e-10
8.7	3.08075e-10
8.8	3.74756e-10
8.9	3.23181e-10
9	3.93372e-10
9.1	3.08685e-10
9.2	3.57513e-10
9.3	3.27606e-10
9.4	3.40424e-10
9.5	3.73535e-10
9.6	4.34418e-10
9.7	3.19366e-10
9.8	2.87933e-10
9.9	3.39508e-10
10	3.10364e-10
10.1	3.76434e-10
10.2	3.13416e-10
10.3	2.9953e-10
10.4	3.76892e-10
10.5	3.58582e-10
10.6	3.4668e-10
10.7	3.41034e-10
10.8	3.62854e-10
10.9	2.97546e-10
11	3.67737e-10
11.1	4.16107e-10
11.2	3.65295e-10
11.3	3.77808e-10
11.4	3.33862e-10
11.5	3.92456e-10
11.6	3.50189e-10
11.7	3.72314e-10
11.8	3.12347e-10
11.9	3.52478e-10
12	3.51105e-10
12.1	3.75061e-10
12.2	3.72314e-10
12.3	3.81317e-10
12.4	3.24402e-10
12.5	3.37677e-10
12.6	3.63007e-10
12.7	3.24249e-10
12.8	3.89252e-10
12.9	3.11127e-10
13	3.62549e-10
13.1	3.15247e-10
13.2	3.71704e-10
13.3	4.60815e-10
13.4	3.35236e-10
13.5	3.80402e-10
13.6	2.86865e-10
13.7	3.10211e-10
13.8	3.47443e-10
13.9	3.76892e-10
14	3.97491e-10
14.1	3.03802e-10
14.2	4.17328e-10
14.3	3.6499e-10
14.4	2.86102e-10
14.5	3.72467e-10
14.6	3.86047e-10
14.7	3.4317e-10
14.8	4.00543e-10
14.9	3.84216e-10
15	3.68195e-10
15.1	3.65448e-10
15.2	3.70941e-10
15.3	3.72772e-10
15.4	2.76794e-10
15.5	3.6499e-10
15.6	3.85437e-10
15.7	3.06702e-10
15.8	3.87268e-10
15.9	3.83759e-10
16	3.64532e-10
16.1	3.52325e-10
16.2	3.61176e-10
16.3	3.40424e-10
16.4	3.52783e-10
16.5	3.88031e-10
16.6	3.66364e-10
16.7	3.96118e-10
16.8	3.74298e-10
16.9	3.64075e-10
17	3.4668e-10
17.1	2.8656e-10
17.2	3.09753e-10
17.3	3.39813e-10
17.4	4.00238e-10
17.5	3.62396e-10
17.6	3.73993e-10
17.7	4.18396e-10
17.8	3.37982e-10
17.9	3.04108e-10
18	3.70178e-10
18.1	3.00293e-10
18.2	3.75061e-10
18.3	3.2196e-10
18.4	3.52325e-10
18.5	3.84064e-10
18.6	3.68042e-10
18.7	3.16772e-10
18.8	3.03802e-10
18.9	3.61938e-10
19	3.63312e-10
19.1	3.56598e-10
19.2	3.50647e-10
19.3	3.94745e-10
19.4	3.57971e-10
19.5	3.5675e-10
19.6	3.45764e-10
19.7	3.29285e-10
19.8	3.685e-10
19.9	3.862e-10
20	3.48511e-10
20.1	3.59802e-10
20.2	3.47748e-10
20.3	3.10974e-10
20.4	3.91998e-10
20.5	3.85742e-10
20.6	2.948e-10
20.7	3.76282e-10
20.8	3.20892e-10
20.9	3.68652e-10
21	3.41949e-10
21.1	3.63617e-10
21.2	3.51868e-10
21.3	3.17841e-10
21.4	4.05884e-10
21.5	3.25775e-10
21.6	3.53241e-10
21.7	2.9892e-10
21.8	3.71246e-10
21.9	3.19672e-10
22	3.36609e-10
22.1	3.30963e-10
22.2	2.93274e-10
22.3	3.49579e-10
22.4	2.93884e-10
22.5	3.24402e-10
22.6	3.26385e-10
22.7	3.60718e-10
22.8	2.88544e-10
22.9	3.26996e-10
23	3.44086e-10
23.1	3.71094e-10
23.2	3.52173e-10
23.3	3.75214e-10
23.4	3.84979e-10
23.5	3.32489e-10
23.6	3.19061e-10
23.7	3.87268e-10
23.8	3.4256e-10
23.9	3.1189e-10
24	3.64075e-10
24.1	3.2074e-10
24.2	3.10059e-10
24.3	3.21045e-10
24.4	3.24554e-10
24.5	3.23639e-10
24.6	4.216e-10
24.7	4.19464e-10
24.8	3.80859e-10
24.9	3.0899e-10
25	3.71399e-10
25.1	3.45917e-10
25.2	3.35693e-10
25.3	3.57361e-10
25.4	3.53088e-10
25.5	3.08533e-10
25.6	3.24097e-10
25.7	3.72009e-10
25.8	3.43475e-10
25.9	3.7674e-10
26	3.56445e-10
26.1	3.79486e-10
26.2	3.25775e-10
26.3	3.16162e-10
26.4	3.65448e-10
26.5	3.56445e-10
26.6	3.33099e-10
26.7	3.52173e-10
26.8	3.64227e-10
26.9	3.61176e-10
27	3.63007e-10
27.1	3.44238e-10
27.2	3.47443e-10
27.3	3.57666e-10
27.4	3.75519e-10
27.5	3.48816e-10
27.6	3.48206e-10
27.7	3.81317e-10
27.8	3.3432e-10
27.9	3.17383e-10
28	3.46222e-10
28.1	3.79333e-10
28.2	3.55682e-10
28.3	3.70026e-10
28.4	3.42865e-10
28.5	3.46985e-10
28.6	3.79944e-10
28.7	3.5553e-10
28.8	3.76434e-10
28.9	3.23181e-10
29	3.73993e-10
29.1	3.19214e-10
29.2	3.92151e-10
29.3	3.21655e-10
29.4	3.14026e-10
29.5	3.82996e-10
29.6	3.11127e-10
29.7	3.55072e-10
29.8	3.17688e-10
29.9	4.45099e-10
30	3.18298e-10
30.1	3.40118e-10
30.2	3.87726e-10
30.3	3.53088e-10
30.4	3.42102e-10
30.5	3.27301e-10
30.6	3.93677e-10
30.7	2.65503e-10
30.8	3.9032e-10
30.9	3.17078e-10
31	3.96881e-10
31.1	3.8208e-10
31.2	3.30658e-10
31.3	4.19922e-10
31.4	3.72162e-10
31.5	4.03595e-10
31.6	3.61938e-10
31.7	3.44238e-10
31.8	3.62854e-10
31.9	3.21198e-10
32	3.08838e-10
32.1	3.9856e-10
32.2	3.36304e-10
32.3	3.51105e-10
32.4	2.89307e-10
32.5	4.39606e-10
32.6	3.57819e-10
32.7	3.67584e-10
32.8	3.52173e-10
32.9	3.4668e-10
33	2.59247e-10
33.1	3.61633e-10
33.2	3.57666e-10
33.3	3.87878e-10
33.4	3.25165e-10
33.5	3.71094e-10
33.6	3.37982e-10
33.7	4.16565e-10
33.8	3.95966e-10
33.9	3.35999e-10
34	3.54614e-10
34.1	3.67279e-10
34.2	3.21808e-10
34.3	3.75061e-10
34.4	3.39203e-10
34.5	3.41492e-10
34.6	3.19214e-10
34.7	3.35693e-10
34.8	3.32031e-10
34.9	3.73993e-10
35	3.41644e-10
35.1	3.09448e-10
35.2	3.58429e-10
35.3	3.04413e-10
35.4	3.32642e-10
35.5	3.13721e-10
35.6	3.82385e-10
35.7	3.56293e-10
35.8	3.28369e-10
35.9	3.61786e-10
36	3.57819e-10
36.1	4.35028e-10
36.2	3.66974e-10
36.3	3.69873e-10
36.4	3.6972e-10
36.5	3.685e-10
36.6	3.60565e-10
36.7	3.7735e-10
36.8	3.28064e-10
36.9	3.27454e-10
37	3.63922e-10
37.1	3.45306e-10
37.2	3.48053e-10
37.3	3.47595e-10
37.4	3.54767e-10
37.5	3.44543e-10
37.6	3.74298e-10
37.7	3.23486e-10
37.8	3.52478e-10
37.9	3.86658e-10
38	3.479e-10
38.1	3.08533e-10
38.2	3.48816e-10
38.3	3.28674e-10
38.4	3.8559e-10
38.5	3.5965e-10
38.6	2.83966e-10
38.7	3.23486e-10
38.8	2.64282e-10
38.9	3.91388e-10
39	3.75671e-10
39.1	3.85132e-10
39.2	3.81622e-10
39.3	3.47443e-10
39.4	3.71857e-10
39.5	3.39508e-10
39.6	3.13568e-10
39.7	3.6087e-10
39.8	3.5141e-10
39.9	3.07617e-10
40	3.52325e-10
40.1	3.51868e-10
40.2	3.48511e-10
40.3	3.73993e-10
40.4	3.16315e-10
40.5	3.44238e-10
40.6	3.20587e-10
40.7	3.79791e-10
40.8	2.9007e-10
40.9	3.508e-10
41	3.60107e-10
41.1	3.95508e-10
41.2	3.38135e-10
41.3	3.72009e-10
41.4	3.10974e-10
41.5	3.16467e-10
41.6	3.64075e-10
41.7	3.07922e-10
41.8	3.50494e-10
41.9	3.15857e-10
42	3.66516e-10
42.1	3.53241e-10
42.2	3.50189e-10
42.3	3.44391e-10
42.4	3.6972e-10
42.5	3.73993e-10
42.6	3.79486e-10
42.7	3.26691e-10
42.8	4.03748e-10
42.9	3.66669e-10
43	3.2547e-10
43.1	3.82233e-10
43.2	3.06702e-10
43.3	3.67737e-10
43.4	3.48206e-10
43.5	3.67432e-10
43.6	3.23486e-10
43.7	3.5202e-10
43.8	3.20129e-10
43.9	3.35083e-10
44	3.4317e-10
44.1	3.00446e-10
44.2	3.61023e-10
44.3	4.05426e-10
44.4	3.47748e-10
44.5	3.72314e-10
44.6	3.53088e-10
44.7	3.62549e-10
44.8	3.79486e-10
44.9	3.71399e-10
45	3.41034e-10
45.1	3.862e-10
45.2	3.53546e-10
45.3	3.41644e-10
45.4	3.86505e-10
45.5	3.302e-10
45.6	2.8183e-10
45.7	4.01001e-10
45.8	3.2486e-10
45.9	3.61633e-10
46	3.05481e-10
46.1	3.71857e-10
46.2	3.22266e-10
46.3	4.13818e-10
46.4	3.66516e-10
46.5	3.37219e-10
46.6	3.57208e-10
46.7	3.53546e-10
46.8	3.32642e-10
46.9	3.29437e-10
47	4.06647e-10
47.1	3.71246e-10
47.2	3.05328e-10
47.3	3.35388e-10
47.4	3.11584e-10
47.5	3.17841e-10
47.6	4.22668e-10
47.7	3.7674e-10
47.8	3.16162e-10
47.9	3.58124e-10
48	3.68805e-10
48.1	3.48969e-10
48.2	3.28064e-10
48.3	3.61176e-10
48.4	3.37524e-10
48.5	3.91388e-10
48.6	2.83813e-10
48.7	3.59955e-10
48.8	3.00598e-10
48.9	3.35236e-10
49	3.66669e-10
49.1	3.63159e-10
49.2	3.28674e-10
49.3	2.99225e-10
49.4	4.10461e-10
49.5	3.55682e-10
49.6	3.71246e-10
49.7	3.09753e-10
49.8	3.59039e-10
49.9	3.16315e-10
50	2.84882e-10
50.1	3.5614e-10
50.2	4.00848e-10
50.3	3.45764e-10
50.4	3.25012e-10
50.5	3.27148e-10
50.6	3.91388e-10
50.7	3.38745e-10
50.8	3.83759e-10
50.9	3.57971e-10
51	3.16925e-10
51.1	3.08685e-10
51.2	3.96576e-10
51.3	2.9541e-10
51.4	3.54156e-10
51.5	3.3905e-10
51.6	3.33862e-10
51.7	3.18604e-10
51.8	2.43378e-10
51.9	3.10669e-10
52	2.92969e-10
52.1	4.38232e-10
52.2	3.46985e-10
52.3	2.76337e-10
52.4	3.27301e-10
52.5	4.47388e-10
52.6	3.52478e-10
52.7	4.03137e-10
52.8	3.40118e-10
52.9	4.06189e-10
53	3.74603e-10
53.1	3.41339e-10
53.2	3.46527e-10
53.3	3.92609e-10
53.4	3.19519e-10
53.5	3.52936e-10
53.6	3.25317e-10
53.7	3.43018e-10
53.8	3.79333e-10
53.9	3.31421e-10
54	3.91998e-10
54.1	3.55835e-10
54.2	3.22723e-10
54.3	3.15552e-10
54.4	3.5202e-10
54.5	2.91748e-10
54.6	3.44391e-10
54.7	3.42102e-10
54.8	3.9566e-10
54.9	3.27606e-10
55	3.78723e-10
55.1	3.18604e-10
55.2	3.49579e-10
55.3	3.59497e-10
55.4	3.3493e-10
55.5	2.96021e-10
55.6	3.49274e-10
55.7	3.42102e-10
55.8	3.75214e-10
55.9	3.68042e-10
56	3.18604e-10
56.1	3.20892e-10
56.2	3.62549e-10
56.3	3.22418e-10
56.4	3.53699e-10
56.5	2.78625e-10
56.6	3.48663e-10
56.7	3.23944e-10
56.8	3.54462e-10
56.9	3.51563e-10
57	3.46222e-10
57.1	3.34473e-10
57.2	3.62244e-10
57.3	2.9541e-10
57.4	3.06396e-10
57.5	4.10767e-10
57.6	3.95813e-10
57.7	3.54309e-10
57.8	3.53546e-10
57.9	3.33862e-10
58	3.69873e-10
58.1	3.62854e-10
58.2	3.49884e-10
58.3	3.17688e-10
58.4	4.07867e-10
58.5	3.17078e-10
58.6	3.20129e-10
58.7	3.63312e-10
58.8	3.90778e-10
58.9	3.42712e-10
59	3.61176e-10
59.1	3.31879e-10
59.2	3.55835e-10
59.3	3.33862e-10
59.4	3.06396e-10
59.5	3.19824e-10
59.6	3.65448e-10
59.7	3.32642e-10
59.8	3.62244e-10
59.9	3.30048e-10
60	3.61176e-10
60.1	3.52631e-10
60.2	3.58276e-10
60.3	3.18298e-10
60.4	3.52631e-10
60.5	3.61481e-10
60.6	3.5614e-10
60.7	3.55225e-10
60.8	3.28369e-10
60.9	2.83966e-10
61	4.27246e-10
61.1	3.58887e-10
61.2	3.42407e-10
61.3	3.44086e-10
61.4	3.15247e-10
61.5	3.51868e-10
61.6	3.08075e-10
61.7	3.36151e-10
61.8	3.23029e-10
61.9	3.54156e-10
62	3.37372e-10
62.1	3.58124e-10
62.2	3.23639e-10
62.3	3.48511e-10
62.4	3.50189e-10
62.5	3.07159e-10
62.6	3.42865e-10
62.7	3.61481e-10
62.8	2.92969e-10
62.9	3.18146e-10
63	3.82233e-10
63.1	3.02582e-10
63.2	2.96326e-10
63.3	3.83606e-10
63.4	2.93732e-10
63.5	3.18298e-10
63.6	3.51562e-10
63.7	3.75366e-10
63.8	3.41339e-10
63.9	3.6087e-10
64	4.02222e-10
64.1	3.14789e-10
64.2	3.2196e-10
64.3	3.27606e-10
64.4	3.43628e-10
64.5	3.58429e-10
64.6	3.50189e-10
64.7	3.18146e-10
64.8	3.97034e-10
64.9	3.35388e-10
65	3.36304e-10
65.1	3.01056e-10
65.2	3.33557e-10
65.3	3.1662e-10
65.4	4.10614e-10
65.5	3.12195e-10
65.6	3.69415e-10
65.7	3.01971e-10
65.8	3.68805e-10
65.9	3.37677e-10
66	3.59802e-10
66.1	2.9129e-10
66.2	3.42102e-10
66.3	3.65143e-10
66.4	3.86353e-10
66.5	3.42865e-10
66.6	4.25415e-10
66.7	3.40118e-10
66.8	3.53394e-10
66.9	3.47595e-10
67	3.0777e-10
67.1	3.7735e-10
67.2	3.46527e-10
67.3	3.28979e-10
67.4	3.07159e-10
67.5	3.2135e-10
67.6	3.36609e-10
67.7	2.69012e-10
67.8	3.37677e-10
67.9	2.77405e-10
68	3.36304e-10
68.1	2.64587e-10
68.2	3.6026e-10
68.3	3.55225e-10
68.4	3.57666e-10
68.5	3.40424e-10
68.6	3.17078e-10
68.7	3.16772e-10
68.8	3.48511e-10
68.9	3.14789e-10
69	2.92358e-10
69.1	3.33099e-10
69.2	3.53088e-10
69.3	3.67584e-10
69.4	3.96729e-10
69.5	2.84729e-10
69.6	3.73535e-10
69.7	3.43628e-10
69.8	3.71552e-10
69.9	3.31573e-10
70	3.48358e-10
70.1	3.06854e-10
70.2	3.01666e-10
70.3	3.17841e-10
70.4	3.96271e-10
70.5	3.75214e-10
70.6	3.71094e-10
70.7	2.6947e-10
70.8	3.69568e-10
70.9	3.61176e-10
71	3.72925e-10
71.1	3.24402e-10
71.2	3.28674e-10
71.3	3.53394e-10
71.4	4.08325e-10
71.5	3.54004e-10
71.6	3.4317e-10
71.7	3.1311e-10
71.8	3.53394e-10
71.9	3.508e-10
72	3.5202e-10
72.1	3.9032e-10
72.2	2.58331e-10
72.3	3.55225e-10
72.4	3.27301e-10
72.5	3.01971e-10
72.6	3.1723e-10
72.7	3.33405e-10
72.8	2.85797e-10
72.9	3.39508e-10
73	3.3783e-10
73.1	3.36304e-10
73.2	2.92511e-10
73.3	3.41644e-10
73.4	2.50549e-10
73.5	3.60413e-10
73.6	3.67584e-10
73.7	3.45917e-10
73.8	3.57208e-10
73.9	3.21198e-10
74	4.1153e-10
74.1	3.02582e-10
74.2	3.61938e-10
74.3	3.28522e-10
74.4	4.039e-10
74.5	3.52631e-10
74.6	2.83203e-10
74.7	4.12445e-10
74.8	3.3493e-10
74.9	3.4729e-10
75	3.44696e-10
75.1	3.63617e-10
75.2	3.47443e-10
75.3	3.01056e-10
75.4	3.48358e-10
75.5	3.38593e-10
75.6	3.5141e-10
75.7	3.5675e-10
75.8	3.33862e-10
75.9	3.80707e-10
76	3.61023e-10
76.1	3.42102e-10
76.2	3.29437e-10
76.3	3.59955e-10
76.4	3.48663e-10
76.5	3.6026e-10
76.6	3.1662e-10
76.7	3.30505e-10
76.8	3.75061e-10
76.9	3.58734e-10
77	3.49731e-10
77.1	3.42102e-10
77.2	3.23334e-10
77.3	4.0802e-10
77.4	3.77197e-10
77.5	3.17841e-10
77.6	3.24402e-10
77.7	3.7323e-10
77.8	3.53088e-10
77.9	3.2959e-10
78	3.76587e-10
78.1	3.70483e-10
78.2	3.862e-10
78.3	3.6911e-10
78.4	3.18298e-10
78.5	3.7796e-10
78.6	3.49121e-10
78.7	3.55072e-10
78.8	3.29742e-10
78.9	2.99683e-10
79	4.11835e-10
79.1	3.27911e-10
79.2	3.3844e-10
79.3	3.71399e-10
79.4	3.27454e-10
79.5	3.76434e-10
79.6	2.93579e-10
79.7	3.62244e-10
79.8	3.29285e-10
79.9	3.31573e-10
80	3.24249e-10
80.1	3.36761e-10
80.2	2.97241e-10
80.3	3.80402e-10
80.4	2.98157e-10
80.5	2.92969e-10
80.6	3.4668e-10
80.7	3.37219e-10
80.8	3.32031e-10
80.9	3.09143e-10
81	3.42102e-10
81.1	3.4729e-10
81.2	3.40118e-10
81.3	3.64532e-10
81.4	3.57819e-10
81.5	3.5675e-10
81.6	3.16315e-10
81.7	3.01514e-10
81.8	3.45612e-10
81.9	3.65143e-10
82	3.46832e-10
82.1	3.65448e-10
82.2	3.25317e-10
82.3	3.22876e-10
82.4	3.48206e-10
82.5	3.0777e-10
82.6	3.43781e-10
82.7	3.30963e-10
82.8	3.61786e-10
82.9	3.39966e-10
83	3.10974e-10
83.1	3.34778e-10
83.2	3.07465e-10
83.3	3.75671e-10
83.4	2.84576e-10
83.5	3.12347e-10
83.6	4.13818e-10
83.7	3.69263e-10
83.8	3.23334e-10
83.9	3.41492e-10
84	3.27911e-10
84.1	3.44696e-10
84.2	3.75061e-10
84.3	2.93732e-10
84.4	3.685e-10
84.5	3.28522e-10
84.6	3.99933e-10
84.7	2.92358e-10
84.8	3.26843e-10
84.9	3.61328e-10
85	3.23181e-10
85.1	3.55682e-10
85.2	3.48358e-10
85.3	3.61328e-10
85.4	3.37677e-10
85.5	3.93372e-10
85.6	3.10059e-10
85.7	3.93829e-10
85.8	2.78778e-10
85.9	3.38287e-10
86	3.62549e-10
86.1	2.88086e-10
86.2	3.99323e-10
86.3	3.05328e-10
86.4	3.40729e-10
86.5	3.27911e-10
86.6	3.93372e-10
86.7	3.22571e-10
86.8	3.37524e-10
86.9	3.70789e-10
87	3.39813e-10
87.1	3.66211e-10
87.2	3.3432e-10
87.3	3.27148e-10
87.4	3.21655e-10
87.5	3.37219e-10
87.6	2.8717e-10
87.7	3.28064e-10
87.8	3.5614e-10
87.9	3.70483e-10
88	2.58484e-10
88.1	4.2511e-10
88.2	3.64685e-10
88.3	3.55988e-10
88.4	3.6972e-10
88.5	3.37219e-10
88.6	3.3371e-10
88.7	3.12653e-10
88.8	3.34167e-10
88.9	3.479e-10
89	2.87018e-10
89.1	3.49274e-10
89.2	2.6886e-10
89.3	3.18604e-10
89.4	2.95715e-10
89.5	3.71552e-10
89.6	3.17841e-10
89.7	3.86963e-10
89.8	3.39661e-10
89.9	3.18298e-10
90	3.55835e-10
90.1	3.1601e-10
90.2	3.35083e-10
90.3	3.7674e-10
90.4	2.97394e-10
90.5	3.34778e-10
90.6	3.27606e-10
90.7	3.4256e-10
90.8	3.29895e-10
90.9	3.56903e-10
91	3.39661e-10
91.1	3.14941e-10
91.2	3.63007e-10
91.3	3.13873e-10
91.4	3.38287e-10
91.5	3.31879e-10
91.6	4.69818e-10
91.7	3.02734e-10
91.8	3.98407e-10
91.9	2.91901e-10
92	3.55377e-10
92.1	3.79028e-10
92.2	3.59955e-10
92.3	3.06549e-10
92.4	3.88947e-10
92.5	2.75574e-10
92.6	3.14941e-10
92.7	3.508e-10
92.8	3.55988e-10
92.9	3.44391e-10
93	3.0426e-10
93.1	3.07007e-10
93.2	3.64075e-10
93.3	2.81067e-10
93.4	3.05939e-10
93.5	3.36761e-10
93.6	3.30048e-10
93.7	3.15399e-10
93.8	2.84119e-10
93.9	3.24707e-10
94	3.65601e-10
94.1	3.58276e-10
94.2	3.37219e-10
94.3	3.68652e-10
94.4	3.45154e-10
94.5	3.31726e-10
94.6	3.24402e-10
94.7	3.55835e-10
94.8	3.71857e-10
94.9	3.79181e-10
95	2.91748e-10
95.1	3.77655e-10
95.2	3.2486e-10
95.3	3.60413e-10
95.4	3.17993e-10
95.5	3.23334e-10
95.6	3.01819e-10
95.7	3.28217e-10
95.8	3.15552e-10
95.9	3.40118e-10
96	3.36151e-10
96.1	3.22418e-10
96.2	3.35999e-10
96.3	3.77197e-10
96.4	3.25928e-10
96.5	3.27759e-10
96.6	3.63312e-10
96.7	3.42102e-10
96.8	3.01514e-10
96.9	3.42407e-10
97	3.44391e-10
97.1	3.18604e-10
97.2	3.45001e-10
97.3	3.28217e-10
97.4	2.44751e-10
97.5	2.72369e-10
97.6	3.78418e-10
97.7	3.97186e-10
97.8	3.32642e-10
97.9	3.48206e-10
98	3.29895e-10
98.1	3.28979e-10
98.2	2.85339e-10
98.3	3.25012e-10
98.4	3.32336e-10
98.5	3.59497e-10
98.6	3.14331e-10
98.7	3.0777e-10
98.8	3.05634e-10
98.9	3.08075e-10
99	3.59802e-10
99.1	3.50189e-10
99.2	3.37677e-10
99.3	3.5553e-10
99.4	3.47137e-10
99.5	2.49481e-10
99.6	2.24304e-10
99.7	3.90778e-10
99.8	3.36151e-10
99.9	3.09448e-10
100	3.77808e-10
100.1	3.3371e-10
100.2	3.09143e-10
100.3	3.61938e-10
100.4	3.10822e-10
100.5	3.19061e-10
100.6	3.56903e-10
100.7	2.84576e-10
100.8	3.56293e-10
100.9	3.47443e-10
101	3.2196e-10
101.1	3.05786e-10
101.2	3.63007e-10
101.3	3.46527e-10
101.4	3.21808e-10
101.5	4.01459e-10
101.6	3.29895e-10
101.7	3.50647e-10
101.8	3.479e-10
101.9	3.59955e-10
102	3.31268e-10
102.1	3.65295e-10
102.2	3.36304e-10
102.3	3.90778e-10
102.4	3.50189e-10
102.5	3.61176e-10
102.6	3.09601e-10
102.7	4.06647e-10
102.8	3.39966e-10
102.9	3.50037e-10
103	3.26996e-10
103.1	3.79181e-10
103.2	3.49274e-10
103.3	3.45306e-10
103.4	2.97241e-10
103.5	3.24554e-10
103.6	3.39966e-10
103.7	3.7323e-10
103.8	3.17993e-10
103.9	3.46985e-10
104	3.34167e-10
104.1	3.29285e-10
104.2	3.70178e-10
104.3	2.91443e-10
104.4	3.32947e-10
104.5	3.33252e-10
104.6	3.47137e-10
104.7	2.88544e-10
104.8	3.02277e-10
104.9	3.04108e-10
105	3.4317e-10
105.1	3.34167e-10
105.2	3.42102e-10
105.3	3.46069e-10
105.4	3.0838e-10
105.5	4.06799e-10
105.6	3.35236e-10
105.7	2.52533e-10
105.8	2.87018e-10
105.9	3.38135e-10
106	3.08533e-10
106.1	2.99835e-10
106.2	3.80859e-10
106.3	3.17993e-10
106.4	3.25317e-10
106.5	3.17535e-10
106.6	3.19366e-10
106.7	3.6499e-10
106.8	3.09601e-10
106.9	3.54156e-10
107	3.45001e-10
107.1	2.50092e-10
107.2	3.94135e-10
107.3	3.35693e-10
107.4	3.33099e-10
107.5	3.65906e-10
107.6	3.36609e-10
107.7	3.61481e-10
107.8	3.32794e-10
107.9	3.49884e-10
108	3.64685e-10
108.1	4.07562e-10
108.2	2.90222e-10
108.3	3.86047e-10
108.4	3.15247e-10
108.5	3.36914e-10
108.6	4.09088e-10
108.7	3.1662e-10
108.8	3.63922e-10
108.9	4.1687e-10
109	3.60413e-10
109.1	3.59039e-10
109.2	3.58734e-10
109.3	3.31726e-10
109.4	3.35846e-10
109.5	3.71552e-10
109.6	3.78876e-10
109.7	3.32336e-10
109.8	3.16162e-10
109.9	3.66058e-10
110	3.94135e-10
110.1	3.78113e-10
110.2	3.30048e-10
110.3	3.63464e-10
110.4	3.51562e-10
110.5	3.01361e-10
110.6	3.5553e-10
110.7	3.05023e-10
110.8	3.20282e-10
110.9	3.94287e-10
111	3.52783e-10
111.1	3.59497e-10
111.2	3.29437e-10
111.3	3.47137e-10
111.4	3.19519e-10
111.5	3.3432e-10
111.6	3.20129e-10
111.7	2.78168e-10
111.8	3.78876e-10
111.9	3.95966e-10
112	3.58734e-10
112.1	3.29437e-10
112.2	3.68195e-10
112.3	3.45306e-10
112.4	3.46375e-10
112.5	3.24402e-10
112.6	3.20129e-10
112.7	3.84979e-10
112.8	3.58582e-10
112.9	3.03192e-10
113	3.56598e-10
113.1	3.05481e-10
113.2	3.57361e-10
113.3	3.80096e-10
113.4	3.42255e-10
113.5	3.53546e-10
113.6	2.92969e-10
113.7	3.24707e-10
113.8	2.77863e-10
113.9	3.68195e-10
114	3.60413e-10
114.1	3.58124e-10
114.2	3.03955e-10
114.3	3.67584e-10
114.4	3.16315e-10
114.5	3.43323e-10
114.6	3.2547e-10
114.7	3.4729e-10
114.8	3.18756e-10
114.9	4.07104e-10
115	3.06549e-10
115.1	3.37982e-10
115.2	2.92664e-10
115.3	3.91846e-10
115.4	3.53241e-10
115.5	3.56293e-10
115.6	3.32794e-10
115.7	3.25317e-10
115.8	3.48816e-10
115.9	3.7384e-10
116	3.39355e-10
116.1	3.3493e-10
116.2	3.18298e-10
116.3	3.93524e-10
116.4	2.77252e-10
116.5	3.95203e-10
116.6	3.40729e-10
116.7	3.62396e-10
116.8	3.43475e-10
116.9	3.73688e-10
117	2.97394e-10
117.1	3.31879e-10
117.2	3.48663e-10
117.3	3.61633e-10
117.4	2.9892e-10
117.5	3.74146e-10
117.6	3.26691e-10
117.7	3.63159e-10
117.8	3.23486e-10
117.9	3.22723e-10
118	3.55225e-10
118.1	3.30505e-10
118.2	3.0777e-10
118.3	3.82843e-10
118.4	2.87628e-10
118.5	3.47443e-10
118.6	3.51868e-10
118.7	3.46985e-10
118.8	3.49274e-10
118.9	3.32184e-10
119	3.25317e-10
119.1	3.80096e-10
119.2	3.36609e-10
119.3	3.34778e-10
119.4	2.70386e-10
119.5	3.05786e-10
119.6	2.6474e-10
119.7	3.40271e-10
119.8	3.685e-10
119.9	2.61536e-10
120	3.59192e-10
120.1	3.65601e-10
120.2	3.60107e-10
120.3	3.70789e-10
120.4	2.83051e-10
120.5	3.17688e-10
120.6	2.70996e-10
120.7	3.34015e-10
120.8	3.35693e-10
120.9	3.04871e-10
121	3.01971e-10
121.1	3.19366e-10
121.2	3.57666e-10
121.3	3.35083e-10
121.4	3.30811e-10
121.5	3.56293e-10
121.6	4.0329e-10
121.7	2.83356e-10
121.8	3.70789e-10
121.9	4.02985e-10
122	2.97394e-10
122.1	3.16467e-10
122.2	3.63312e-10
122.3	3.71857e-10
122.4	3.27759e-10
122.5	3.04108e-10
122.6	3.45459e-10
122.7	3.15704e-10
122.8	3.13263e-10
122.9	3.55377e-10
123	3.02429e-10
123.1	3.31421e-10
123.2	3.39661e-10
123.3	3.17078e-10
123.4	3.0777e-10
123.5	4.09393e-10
123.6	2.96173e-10
123.7	3.58887e-10
123.8	3.46527e-10
123.9	3.37219e-10
124	3.55225e-10
124.1	3.59802e-10
124.2	2.96326e-10
124.3	3.15399e-10
124.4	3.4317e-10
124.5	3.54156e-10
124.6	3.65601e-10
124.7	3.58276e-10
124.8	3.45001e-10
124.9	3.67737e-10
125	3.02124e-10
125.1	3.30811e-10
125.2	3.35083e-10
125.3	4.07562e-10
125.4	2.4231e-10
125.5	3.75519e-10
125.6	3.00598e-10
125.7	3.43018e-10
125.8	3.86963e-10
125.9	3.26996e-10
126	3.84369e-10
126.1	3.74298e-10
126.2	2.87933e-10
126.3	3.53241e-10
126.4	3.2547e-10
126.5	3.45917e-10
126.6	3.3844e-10
126.7	3.78723e-10
126.8	3.46527e-10
126.9	3.12042e-10
127	2.84882e-10
127.1	3.86963e-10
127.2	2.88086e-10
127.3	3.51868e-10
127.4	3.685e-10
127.5	4.00543e-10
127.6	3.38745e-10
127.7	3.58734e-10
127.8	2.90375e-10
127.9	3.56293e-10
128	2.65656e-10
128.1	3.33252e-10
128.2	3.12958e-10
128.3	3.39355e-10
128.4	3.54004e-10
128.5	3.91388e-10
128.6	3.47748e-10
128.7	3.41797e-10
128.8	2.92969e-10
128.9	3.16925e-10
129	3.59802e-10
129.1	3.36456e-10
129.2	2.90527e-10
129.3	3.17078e-10
129.4	3.06396e-10
129.5	3.44391e-10
129.6	3.32184e-10
129.7	4.10156e-10
129.8	3.06244e-10
129.9	3.55988e-10
130	3.41492e-10
130.1	3.5614e-10
130.2	2.80762e-10
130.3	3.31116e-10
130.4	3.15704e-10
130.5	3.41339e-10
130.6	2.93274e-10
130.7	3.60413e-10
130.8	3.67737e-10
130.9	3.39966e-10
131	3.15552e-10
131.1	2.71606e-10
131.2	2.84119e-10
131.3	3.28217e-10
131.4	3.37372e-10
131.5	3.44543e-10
131.6	3.64075e-10
131.7	3.57971e-10
131.8	2.69165e-10
131.9	3.73993e-10
132	3.06091e-10
132.1	2.99072e-10
132.2	2.98615e-10
132.3	3.69263e-10
132.4	2.65961e-10
132.5	3.68652e-10
132.6	3.09753e-10
132.7	3.21198e-10
132.8	3.61938e-10
132.9	3.60718e-10
133	2.56958e-10
133.1	3.46527e-10
133.2	2.77557e-10
133.3	3.47748e-10
133.4	3.09296e-10
133.5	3.52631e-10
133.6	2.48871e-10
133.7	3.96423e-10
133.8	3.30505e-10
133.9	3.43475e-10
134	3.19672e-10
134.1	3.34625e-10
134.2	3.06702e-10
134.3	3.74756e-10
134.4	3.76282e-10
134.5	2.82288e-10
134.6	3.58276e-10
134.7	3.7735e-10
134.8	3.00751e-10
134.9	4.23431e-10
135	3.31421e-10
135.1	3.5675e-10
135.2	2.91443e-10
135.3	3.21655e-10
135.4	3.41034e-10
135.5	2.95258e-10
135.6	4.13971e-10
135.7	3.72162e-10
135.8	2.79846e-10
135.9	3.35083e-10
136	3.41492e-10
136.1	3.06396e-10
136.2	3.59802e-10
136.3	3.0777e-10
136.4	3.26996e-10
136.5	3.31879e-10
136.6	3.71552e-10
136.7	2.94189e-10
136.8	3.37524e-10
136.9	3.53394e-10
137	2.69623e-10
137.1	3.54767e-10
137.2	3.7323e-10
137.3	2.65961e-10
137.4	4.03442e-10
137.5	3.45459e-10
137.6	2.62756e-10
137.7	3.6499e-10
137.8	3.9032e-10
137.9	2.65045e-10
138	3.34167e-10
138.1	3.84979e-10
138.2	3.78265e-10
138.3	3.25165e-10
138.4	3.53088e-10
138.5	3.44849e-10
138.6	3.69873e-10
138.7	3.14789e-10
138.8	3.30353e-10
138.9	3.66974e-10
139	3.63617e-10
139.1	2.7298e-10
139.2	3.20892e-10
139.3	3.57666e-10
139.4	2.89154e-10
139.5	2.98462e-10
139.6	3.17841e-10
139.7	3.14941e-10
139.8	3.48511e-10
139.9	3.63007e-10
140	4.17023e-10
140.1	3.23639e-10
140.2	3.03192e-10
140.3	3.60718e-10
140.4	2.70386e-10
140.5	3.33862e-10
140.6	3.73383e-10
140.7	2.41547e-10
140.8	3.85437e-10
140.9	3.52936e-10
141	2.6413e-10
141.1	3.58734e-10
141.2	3.72772e-10
141.3	3.31879e-10
141.4	3.13263e-10
141.5	3.63007e-10
141.6	3.20129e-10
141.7	3.14484e-10
141.8	3.75214e-10
141.9	2.86865e-10
142	3.42407e-10
142.1	3.28064e-10
142.2	2.78473e-10
142.3	2.58484e-10
142.4	3.29895e-10
142.5	2.88086e-10
142.6	3.49579e-10
142.7	4.01154e-10
142.8	2.87781e-10
142.9	3.59497e-10
143	4.01459e-10
143.1	3.23792e-10
143.2	2.61688e-10
143.3	3.53699e-10
143.4	3.52783e-10
143.5	3.8269e-10
143.6	3.25012e-10
143.7	3.12958e-10
143.8	3.1662e-10
143.9	3.56598e-10
144	2.62146e-10
144.1	3.55072e-10
144.2	3.80859e-10
144.3	2.82593e-10
144.4	3.42102e-10
144.5	3.0365e-10
144.6	2.81982e-10
144.7	3.83606e-10
144.8	3.39355e-10
144.9	3.01056e-10
145	3.27911e-10
145.1	2.77557e-10
145.2	3.23639e-10
145.3	3.03192e-10
145.4	3.44238e-10
145.5	3.18756e-10
145.6	2.80304e-10
145.7	3.51868e-10
145.8	2.97241e-10
145.9	3.23639e-10
146	3.62396e-10
146.1	3.84369e-10
146.2	3.46527e-10
146.3	3.64838e-10
146.4	2.92816e-10
146.5	3.62854e-10
146.6	3.32031e-10
146.7	3.64838e-10
146.8	2.77405e-10
146.9	3.17383e-10
147	3.45154e-10
147.1	3.44849e-10
147.2	2.7298e-10
147.3	2.91443e-10
147.4	4.14124e-10
147.5	3.73077e-10
147.6	3.09906e-10
147.7	3.11584e-10
147.8	3.42102e-10
147.9	4.03442e-10
148	2.15607e-10
148.1	3.27911e-10
148.2	3.29895e-10
148.3	3.98865e-10
148.4	2.65045e-10
148.5	2.87476e-10
148.6	3.54309e-10
148.7	3.68347e-10
148.8	2.69165e-10
148.9	3.90472e-10
149	3.80249e-10
149.1	3.11432e-10
149.2	3.00598e-10
149.3	3.32642e-10
149.4	3.35693e-10
149.5	3.40424e-10
149.6	2.77863e-10
149.7	3.03192e-10
149.8	2.72217e-10
149.9	3.62854e-10
150	3.33252e-10
150.1	2.9541e-10
150.2	2.88696e-10
150.3	3.44543e-10
150.4	3.22723e-10
150.5	3.37372e-10
150.6	3.17993e-10
150.7	2.99377e-10
150.8	3.08685e-10
150.9	3.31421e-10
151	2.90985e-10
151.1	2.97852e-10
151.2	3.92914e-10
151.3	3.40881e-10
151.4	3.0899e-10
151.5	3.67737e-10
151.6	3.25775e-10
151.7	3.54462e-10
151.8	2.70233e-10
151.9	3.56598e-10
152	3.23029e-10
152.1	3.8559e-10
152.2	2.65045e-10
152.3	3.28369e-10
152.4	3.22113e-10
152.5	3.4668e-10
152.6	3.1189e-10
152.7	3.03345e-10
152.8	3.91541e-10
152.9	3.17078e-10
153	2.49634e-10
153.1	2.742e-10
153.2	2.77252e-10
153.3	4.41742e-10
153.4	3.30658e-10
153.5	2.81677e-10
153.6	3.82843e-10
153.7	3.11127e-10
153.8	3.59955e-10
153.9	3.14789e-10
154	3.27148e-10
154.1	3.39203e-10
154.2	2.85797e-10
154.3	3.45306e-10
154.4	3.50647e-10
154.5	3.23181e-10
154.6	2.81372e-10
154.7	4.00543e-10
154.8	3.02887e-10
154.9	3.39203e-10
155	3.39355e-10
155.1	3.27911e-10
155.2	3.2547e-10
155.3	3.01971e-10
155.4	3.43475e-10
155.5	3.46375e-10
155.6	3.4256e-10
155.7	3.23029e-10
155.8	3.11737e-10
155.9	3.46222e-10
156	3.74756e-10
156.1	3.57208e-10
156.2	3.03192e-10
156.3	3.77197e-10
156.4	3.48511e-10
156.5	2.79236e-10
156.6	2.86255e-10
156.7	3.59955e-10
156.8	2.7298e-10
156.9	3.77502e-10
157	4.02679e-10
157.1	3.07922e-10
157.2	2.74658e-10
157.3	4.02832e-10
157.4	3.61938e-10
157.5	3.11279e-10
157.6	2.64282e-10
157.7	3.65143e-10
157.8	2.97852e-10
157.9	3.54004e-10
158	4.0451e-10
158.1	2.75421e-10
158.2	3.01361e-10
158.3	3.67584e-10
158.4	3.47748e-10
158.5	3.07007e-10
158.6	3.54767e-10
158.7	3.0365e-10
158.8	2.59552e-10
158.9	3.45764e-10
159	4.07562e-10
159.1	2.57111e-10
159.2	3.45612e-10
159.3	3.64075e-10
159.4	3.42865e-10
159.5	3.58582e-10
159.6	3.5553e-10
159.7	3.40729e-10
159.8	3.8559e-10
159.9	2.33459e-10
160	3.50189e-10
160.1	3.42255e-10
160.2	3.18451e-10
160.3	3.13873e-10
160.4	3.26538e-10
160.5	3.4317e-10
160.6	3.55377e-10
160.7	3.79791e-10
160.8	2.59094e-10
160.9	3.39966e-10
161	3.18451e-10
161.1	2.62756e-10
161.2	3.1601e-10
161.3	2.79388e-10
161.4	3.17993e-10
161.5	3.59039e-10
161.6	3.6972e-10
161.7	3.17688e-10
161.8	3.45764e-10
161.9	4.40063e-10
162	3.66669e-10
162.1	3.25165e-10
162.2	3.27148e-10
162.3	3.65295e-10
162.4	3.43018e-10
162.5	2.43835e-10
162.6	3.28827e-10
162.7	2.95715e-10
162.8	3.48511e-10
162.9	3.1723e-10
163	3.42407e-10
163.1	3.7735e-10
163.2	3.21503e-10
163.3	2.72369e-10
163.4	3.05634e-10
163.5	3.28369e-10
163.6	3.80554e-10
163.7	3.9444e-10
163.8	3.05328e-10
163.9	3.27911e-10
164	3.51715e-10
164.1	2.82898e-10
164.2	3.44543e-10
164.3	2.90833e-10
164.4	3.18604e-10
164.5	3.78876e-10
164.6	3.48206e-10
164.7	2.742e-10
164.8	2.55432e-10
164.9	4.11682e-10
165	3.56598e-10
165.1	3.5614e-10
165.2	2.70081e-10
165.3	3.18451e-10
165.4	2.99683e-10
165.5	3.97949e-10
165.6	3.09448e-10
165.7	3.16467e-10
165.8	3.28064e-10
165.9	3.51562e-10
166	3.78876e-10
166.1	2.6474e-10
166.2	2.84576e-10
166.3	3.56293e-10
166.4	3.51105e-10
166.5	2.79388e-10
166.6	3.16925e-10
166.7	3.61938e-10
166.8	2.79999e-10
166.9	2.59552e-10
167	3.49426e-10
167.1	3.63159e-10
167.2	3.7262e-10
167.3	3.30963e-10
167.4	3.3432e-10
167.5	3.12653e-10
167.6	2.85797e-10
167.7	2.65045e-10
167.8	2.948e-10
167.9	3.30505e-10
168	3.37982e-10
168.1	3.2959e-10
168.2	3.55988e-10
168.3	2.95105e-10
168.4	4.34875e-10
168.5	3.40881e-10
168.6	3.06702e-10
168.7	3.18146e-10
168.8	4.08936e-10
168.9	3.11584e-10
169	2.89917e-10
169.1	3.50952e-10
169.2	3.6087e-10
169.3	3.06854e-10
169.4	3.19366e-10
169.5	3.27148e-10
169.6	3.0899e-10
169.7	3.09753e-10
169.8	3.21198e-10
169.9	2.82898e-10
170	2.79236e-10
170.1	3.25775e-10
170.2	3.2196e-10
170.3	3.42865e-10
170.4	2.86865e-10
170.5	2.94342e-10
170.6	3.30963e-10
170.7	3.37982e-10
170.8	3.53394e-10
170.9	2.95715e-10
171	2.97699e-10
171.1	3.73077e-10
171.2	3.74603e-10
171.3	3.51715e-10
171.4	2.96478e-10
171.5	3.33557e-10
171.6	3.68805e-10
171.7	3.53241e-10
171.8	3.57208e-10
171.9	2.64587e-10
172	3.16315e-10
172.1	3.43628e-10
172.2	3.68805e-10
172.3	3.22266e-10
172.4	3.63312e-10
172.5	2.95868e-10
172.6	3.01056e-10
172.7	4.13971e-10
172.8	3.33557e-10
172.9	2.94647e-10
173	3.51868e-10
173.1	3.18604e-10
173.2	3.27911e-10
173.3	3.302e-10
173.4	2.83813e-10
173.5	2.72675e-10
173.6	2.92664e-10
173.7	3.28522e-10
173.8	3.96271e-10
173.9	3.28217e-10
174	2.05994e-10
174.1	3.31116e-10
174.2	2.93884e-10
174.3	4.02679e-10
174.4	1.91345e-10
174.5	1.31836e-10
174.6	3.43475e-10
174.7	3.74146e-10
174.8	2.85339e-10
174.9	3.09601e-10
175	2.92816e-10
175.1	3.15247e-10
175.2	3.96271e-10
175.3	4.70123e-10
175.4	4.45557e-10
175.5	5.26123e-10
175.6	4.36707e-10
175.7	3.20435e-10
175.8	3.04718e-10
175.9	3.57971e-10
176	3.60718e-10
176.1	4.4342e-10
176.2	5.66406e-10
176.3	3.32642e-10
176.4	1.53198e-10
176.5	2.59094e-10
176.6	3.96729e-10
176.7	4.03595e-10
176.8	3.83759e-10
176.9	3.38287e-10
177	3.55377e-10
177.1	4.36554e-10
177.2	2.76184e-10
177.3	4.6936e-10
177.4	3.57361e-10
177.5	2.83508e-10
177.6	4.1153e-10
177.7	3.51563e-10
177.8	3.84064e-10
177.9	4.22516e-10
178	4.19159e-10
178.1	5.00793e-10
178.2	4.98352e-10
178.3	2.9953e-10
178.4	4.07867e-10
178.5	4.30603e-10
178.6	5.55115e-10
178.7	5.50842e-10
178.8	5.66864e-10
178.9	4.14276e-10
179	4.51813e-10
179.1	4.68292e-10
179.2	5.50079e-10
179.3	3.99933e-10
179.4	5.00183e-10
179.5	4.10614e-10
179.6	5.64117e-10
179.7	4.15955e-10
179.8	4.12292e-10
179.9	5.24902e-10
180	5.08881e-10
180.1	3.9856e-10
180.2	5.44128e-10
180.3	6.92444e-10
180.4	5.08881e-10
180.5	5.27649e-10
180.6	6.79779e-10
180.7	3.69415e-10
180.8	4.23584e-10
180.9	6.44531e-10
181	4.70581e-10
181.1	6.5155e-10
181.2	6.02112e-10
181.3	4.89502e-10
181.4	4.05884e-10
181.5	4.19922e-10
181.6	5.04761e-10
181.7	5.36804e-10
181.8	4.69818e-10
181.9	5.25055e-10
182	5.55878e-10
182.1	5.87311e-10
182.2	6.0257e-10
182.3	4.94385e-10
182.4	5.50079e-10
182.5	5.00793e-10
182.6	5.48401e-10
182.7	5.54047e-10
182.8	4.6402e-10
182.9	5.55267e-10
183	5.36652e-10
183.1	4.59442e-10
183.2	4.55627e-10
183.3	4.599e-10
183.4	5.23376e-10
183.5	5.1712e-10
183.6	4.8584e-10
183.7	3.87268e-10
183.8	5.27802e-10
183.9	3.31879e-10
184	4.65698e-10
184.1	4.60358e-10
184.2	5.09033e-10
184.3	3.7384e-10
184.4	4.63715e-10
184.5	4.78821e-10
184.6	5.53894e-10
184.7	4.5639e-10
184.8	4.65088e-10
184.9	4.40216e-10
185	4.36859e-10
185.1	4.15039e-10
185.2	4.14581e-10
185.3	1.97144e-10
185.4	-6.89697e-11
185.5	8.36182e-11
185.6	-1.13678e-10
185.7	1.26648e-10
185.8	2.63672e-10
185.9	1.57166e-09
186	1.27884e-09
186.1	6.78406e-10
186.2	4.36401e-10
186.3	4.52423e-10
186.4	4.49524e-10
186.5	4.87366e-10
186.6	4.4342e-10
186.7	3.88031e-10
186.8	3.91388e-10
186.9	3.96729e-10
187	4.41895e-10
187.1	4.22974e-10
187.2	3.30811e-10
187.3	3.92914e-10
187.4	3.80554e-10
187.5	3.82996e-10
187.6	4.0329e-10
187.7	1.87378e-10
187.8	6.82068e-11
187.9	-1.38855e-11
188	3.50647e-10
188.1	3.60718e-10
188.2	-1.14441e-11
188.3	-4.33197e-10
188.4	-3.78769e-09
188.5	-2.77496e-09
188.6	-1.64459e-09
188.7	-9.2865e-10
188.8	-5.6488e-10
188.9	-5.23987e-10
189	-1.1972e-09
189.1	-1.23108e-09
189.2	-1.02905e-09
189.3	-9.18884e-10
189.4	-7.39441e-10
189.5	-6.19049e-10
189.6	-4.35791e-10
189.7	-1.39771e-10
189.8	-7.30896e-11
189.9	8.8501e-11
190	-4.22668e-11
190.1	6.08826e-11
190.2	7.70569e-11
190.3	2.0813e-10
190.4	3.24554e-10
190.5	4.05884e-10
190.6	3.23944e-10
190.7	4.10004e-10
190.8	4.68445e-10
190.9	5.18494e-10
191	4.84772e-10
191.1	4.87671e-10
191.2	5.52368e-10
191.3	6.16455e-10
191.4	5.53131e-10
191.5	5.91583e-10
191.6	6.70929e-10
191.7	6.54144e-10
191.8	6.28204e-10
191.9	6.60553e-10
192	7.08313e-10
192.1	7.70111e-10
192.2	6.67267e-10
192.3	7.1228e-10
192.4	6.97479e-10
192.5	8.19702e-10
192.6	7.43561e-10
192.7	8.10852e-10
192.8	7.55005e-10
192.9	8.38776e-10
193	7.87201e-10
193.1	7.87659e-10
193.2	8.24585e-10
193.3	8.88519e-10
193.4	8.58612e-10
193.5	8.20465e-10
193.6	8.73108e-10
193.7	8.66394e-10
193.8	9.16443e-10
193.9	8.98895e-10
194	8.67462e-10
194.1	9.66339e-10
194.2	9.79614e-10
194.3	9.75037e-10
194.4	9.33685e-10
194.5	9.39484e-10
194.6	9.31091e-10
194.7	9.62372e-10
194.8	9.33838e-10
194.9	9.66492e-10
195	8.43811e-10
195.1	9.35669e-10
195.2	9.00421e-10
195.3	1.09756e-09
195.4	1.16699e-09
195.5	1.27121e-09
195.6	1.24893e-09
195.7	1.10077e-09
195.8	9.26361e-10
195.9	8.9325e-10
196	9.62219e-10
196.1	5.87463e-10
196.2	3.92456e-10
196.3	6.12946e-10
196.4	1.1731e-09
196.5	1.41998e-09
196.6	1.4798e-09
196.7	1.54312e-09
196.8	1.56448e-09
196.9	1.61377e-09
197	1.52237e-09
197.1	1.47842e-09
197.2	1.56448e-09
197.3	1.59302e-09
197.4	1.57822e-09
197.5	1.67236e-09
197.6	1.60248e-09
197.7	1.69128e-09
197.8	1.56631e-09
197.9	1.66687e-09
198	1.66916e-09
198.1	1.67007e-09
198.2	1.65161e-09
198.3	1.66489e-09
198.4	1.7128e-09
198.5	1.76117e-09
198.6	1.71036e-09
198.7	1.72836e-09
198.8	1.68335e-09
198.9	1.71097e-09
199	1.75797e-09
199.1	1.7984e-09
199.2	1.69067e-09
199.3	1.77383e-09
199.4	1.82495e-09
199.5	1.84494e-09
199.6	1.71021e-09
199.7	1.81213e-09
199.8	1.75201e-09
199.9	1.8605e-09
[truncated: 16,003 more rows]
